# Supplementary material for: NHE Inhibition Does Not Improve Na+ or Ca2+ Overload During Reperfusion: Using Modeling to Illuminate the Mechanisms Underlying a Therapeutic Failure
Source: PLOS journal article supplement (doi:10.1371/journal.pcbi.1002241), 2011-10-20
Supplement: S1 (10.1371/journal.pcbi.1002241.s001) [file journal.pcbi.1002241.s001]

## **Text S1**

Supplementary Material for “NHE Inhibition Does Not Improve  $\text{Na}^+$  or  $\text{Ca}^{2+}$  Overload During Reperfusion: Using Modeling to Illuminate the Mechanisms Underlying a Therapeutic Failure.”

Byron N. Roberts and David J. Christini

## Symbols and Values

| Abbreviation                | Parameter                                                   | Units            | Constant Value |
|-----------------------------|-------------------------------------------------------------|------------------|----------------|
| $A_{\text{cap}}$            | capacitive area                                             | $\text{cm}^2$    | 0.0001534 [1]  |
| $aa_{\text{AE}}$            | transition rate (AE)                                        | N/A              | N/A            |
| $aa_{\text{CHE}}$           | transition rate (CHE)                                       | N/A              | N/A            |
| $aa_{\text{NBC}}$           | transition rate (NBC)                                       | N/A              | N/A            |
| $aa_{\text{NHE}}$           | transition rate (NHE)                                       | N/A              | N/A            |
| $[\text{ADP}]$              | ADP concentration                                           | mM               | N/A            |
| $\alpha_{\text{h}}$         | opening rate constant for h gate                            | $\text{ms}^{-1}$ | N/A            |
| $\alpha_{\text{j}}$         | opening rate constant for j gate                            | $\text{ms}^{-1}$ | N/A            |
| $\alpha_{\text{K1}}$        | rate constant for $I_{\text{K1}}$ inactivation              | $\text{ms}^{-1}$ | N/A            |
| $\alpha_{\text{m}}$         | opening rate constant for m gate                            | $\text{ms}^{-1}$ | N/A            |
| $\alpha_{\text{p}}$         | opening rate constant for p gate                            | $\text{ms}^{-1}$ | N/A            |
| $\alpha_{\text{NaK1}}^+$    | forward rate constant (NaK)                                 | $\text{s}^{-1}$  | N/A            |
| $\alpha_{\text{NaK1}}^-$    | reverse rate constant (NaK)                                 | $\text{s}^{-1}$  | N/A            |
| $\alpha_{\text{NaK2}}^+$    | forward rate constant (NaK)                                 | $\text{s}^{-1}$  | N/A            |
| $\alpha_{\text{NaK2}}^-$    | reverse rate constant (NaK)                                 | $\text{s}^{-1}$  | N/A            |
| $\alpha_{\text{NaK3}}^+$    | forward rate constant (NaK)                                 | $\text{s}^{-1}$  | N/A            |
| $\alpha_{\text{NaK3}}^-$    | reverse rate constant (NaK)                                 | $\text{s}^{-1}$  | N/A            |
| $\alpha_{\text{NaK4}}^+$    | forward rate constant (NaK)                                 | $\text{s}^{-1}$  | N/A            |
| $\alpha_{\text{NaK4}}^-$    | reverse rate constant (NaK)                                 | $\text{s}^{-1}$  | N/A            |
| $\alpha_{1,\text{SERCA}}^+$ | apparent forward rate constant                              | $\text{s}^{-1}$  | N/A            |
| $\alpha_{1,\text{SERCA}}^-$ | apparent reverse rate constant                              | $\text{s}^{-1}$  | N/A            |
| $\alpha_{2,\text{SERCA}}^+$ | apparent forward rate constant                              | $\text{s}^{-1}$  | N/A            |
| $\alpha_{2,\text{SERCA}}^-$ | apparent reverse rate constant                              | $\text{s}^{-1}$  | N/A            |
| $\alpha_{3,\text{SERCA}}^+$ | apparent forward rate constant                              | $\text{s}^{-1}$  | N/A            |
| $\alpha_{3,\text{SERCA}}^-$ | apparent reverse rate constant                              | $\text{s}^{-1}$  | N/A            |
| $[\text{AMP}]$              | AMP concentration                                           | mM               | N/A            |
| $[\text{Anion}^-]$          | concentration of conjugate anions due to metabolic acidosis | mM               | N/A            |
| $[\text{ATP}]$              | ATP concentration                                           | mM               | N/A            |
| $[\widetilde{\text{ATP}}]$  | apparent concentration of enzyme-bound ion (NaK)            | N/A              | N/A            |
| $b$                         | $I_{\text{Ca,t}}$ activation gate                           | N/A              | N/A            |
| $b_{\infty}$                | steady state value for b gate                               | N/A              | N/A            |
| $bb_{\text{AE}}$            | transition rate (AE)                                        | N/A              | N/A            |
| $bb_{\text{CHE}}$           | transition rate (CHE)                                       | N/A              | N/A            |
| $bb_{\text{NBC}}$           | transition rate (NBC)                                       | N/A              | N/A            |

Table S1: Note: numbers in brackets refer to citations in the bibliography at the end of this supplement.

| Abbreviation                | Parameter                                                       | Units              | Constant Value |
|-----------------------------|-----------------------------------------------------------------|--------------------|----------------|
| $bb_{NHE}$                  | transition rate (NHE)                                           | N/A                | N/A            |
| $\beta_{cai}$               | $Ca^{2+}$ buffering                                             | N/A                | N/A            |
| $\beta_{CMDN}$              | calmodulin buffering power                                      | N/A                | N/A            |
| $\beta_{CSQN}$              | calsequestrin buffering power                                   | N/A                | N/A            |
| $\beta_e$                   | extracellular intrinsic (non- $CO_2$ ) buffering capacity       | N/A                | N/A            |
| $\beta_h$                   | closing rate constant for h gate                                | $ms^{-1}$          | N/A            |
| $\beta_i$                   | intracellular intrinsic (non- $CO_2$ ) buffering capacity       | N/A                | N/A            |
| $\beta_j$                   | closing rate constant for j gate                                | $ms^{-1}$          | N/A            |
| $\beta_{K1}$                | rate constant for $I_{K1}$ inactivation                         | $ms^{-1}$          | N/A            |
| $\beta_m$                   | closing rate constant for m gate                                | $ms^{-1}$          | N/A            |
| $\beta_p$                   | closing rate constant for p gate                                | $ms^{-1}$          | N/A            |
| $\beta_{TRPN}$              | troponin buffering powering power                               | N/A                | N/A            |
| $c_{ADP}$                   | closed prob. because two ADP molecules not bound to one subunit | N/A                | N/A            |
| $[Ca_i^{2+}]$               | intracellular $Ca^{2+}$ concentration                           | mM                 | N/A            |
| $[Ca_o^{2+}]$               | extracellular $Ca^{2+}$ concentration                           | mM                 | N/A            |
| $\widetilde{Ca}_{i,SERCA}$  | apparent $Ca^{2+}$ binding to SERCA in myoplasm                 | N/A                | N/A            |
| $\widetilde{Ca}_{SR,SERCA}$ | apparent $Ca^{2+}$ binding to SERCA in SR                       | N/A                | N/A            |
| $cc_{AE}$                   | transition rate (AE)                                            | N/A                | N/A            |
| $cc_{CHE}$                  | transition rate (CHE)                                           | N/A                | N/A            |
| $cc_{NBC}$                  | transition rate (NBC)                                           | N/A                | N/A            |
| $cc_{NHE}$                  | transition rate (NHE)                                           | N/A                | N/A            |
| $[Cl_e^-]$                  | extracellular chloride concentration                            | mM                 | 146.7 [2]      |
| $[Cl_i^-]$                  | intracellular chloride concentration                            | mM                 | N/A            |
| $C_m$                       | membrane capacitance                                            | $\mu F/cm^2$       | 1.0 [1]        |
| $[CMDN]$                    | concentration of $Ca^{2+}$ bound to calmodulin                  | mM                 | N/A            |
| $\overline{[CMDN]}$         | max $[Ca^{2+}]$ bound to calmodulin                             | mM                 | 0.050 [1]      |
| $[CO_{2,e}]$                | extracellular carbon dioxide concentration                      | mM                 | N/A            |
| $CO_{2sol}$                 | carbon dioxide solubility                                       | mM                 | 0.03253 [1]    |
| $[CO_{2,i}]$                | intracellular carbon dioxide concentration                      | mM                 | N/A            |
| $[Cr]$                      | creatine concentration                                          | mM                 | N/A            |
| $[CSQN]$                    | concentration of $Ca^{2+}$ bound to calsequestrin               | mM                 | N/A            |
| $csqnth$                    | threshold for $Ca^{2+}$ release from CSQN due to JSR overload   | mM                 | 8.75 [1]       |
| $\overline{[CSQN]}$         | max $[Ca^{2+}]$ bound to calsequestrin                          | mM                 | 10.0 [1]       |
| $cyc_{NaK}$                 | clockwise steady-state cycle rate (NaK)                         | $s^{-1}$           | N/A            |
| $cyc_{SERCA}$               | SERCA cycling rate                                              | $s^{-1}$           | N/A            |
| $C_0$                       | constant used in calculating voltage by charge diff. method     | mM                 | N/A            |
| $c1$                        | scaling factor for $I_{NaCa}$                                   | $\mu A/\mu F$      | 0.00015        |
| $c2$                        | half-saturation concentration for NaCa exchanger                | mM                 | 0.0001 [1]     |
| $d$                         | $I_{Ca(L)}$ activation gate                                     | N/A                | N/A            |
| $d_\infty$                  | steady state value for d gate                                   | N/A                | N/A            |
| $dd_{AE}$                   | transition rate (AE)                                            | N/A                | N/A            |
| $dd_{CHE}$                  | transition rate (CHE)                                           | N/A                | N/A            |
| $dd_{NBC}$                  | transition rate (NBC)                                           | N/A                | N/A            |
| $dd_{NHE}$                  | transition rate (NHE)                                           | N/A                | N/A            |
| $\Delta t$                  | time step                                                       | ms                 | 0.005          |
| $density_{NaK}$             | density of NaK pump enzymes in sarcolemma                       | $\mu m^{-2}$       | 7450.0 [3]     |
| $dI_{Ca,total}$             | rate of $Ca^{2+}$ flux across membrane                          | $\mu A/(\mu F*ms)$ | N/A            |
| $dvdtnew$                   | change in V between time steps                                  | mV/ms              | N/A            |
| $E_{Ca}$                    | $Ca^{2+}$ reversal potential                                    | mV                 | N/A            |
| $E_K$                       | $K^+$ reversal potential                                        | mV                 | N/A            |

| Abbreviation           | Parameter                                                         | Units     | Constant Value      |
|------------------------|-------------------------------------------------------------------|-----------|---------------------|
| $E_{Ks}$               | $K^+$ reversal potential for $I_{Ks}$                             | mV        | N/A                 |
| $E_{Na}$               | $Na^+$ reversal potential                                         | mV        | N/A                 |
| F                      | Faraday's constant                                                | C/mol     | 96485.0 [1]         |
| f                      | $I_{Ca(L)}$ inactivation gate                                     | N/A       | N/A                 |
| $f_{\infty}$           | steady state value for f gate                                     | N/A       | N/A                 |
| $f_{ADP}$              | open probability due to ADP binding                               | N/A       | N/A                 |
| $f'_{ADP}$             | open probability due to ADP binding                               | N/A       | N/A                 |
| $f_{ATP}$              | fraction of channels open because no ATP binding                  | N/A       | N/A                 |
| $f_{Ca}$               | $I_{Ca(L)}$ $Ca^{2+}$ dependent inactivation gate                 | N/A       | N/A                 |
| $f_{Ca,ATP}$           | relative $I_{Ca(L)}$ channel availability                         | N/A       | N/A                 |
| $f_{K(ATP)}$           | open probability (no ATP or two ADP bound to subunit)             | N/A       | N/A                 |
| $f_{aCH,R,YR}$         | pH-dependent modification of RYR activity                         | N/A       | N/A                 |
| $f_{aNaCa}$            | pH-dependent modification of NaCa activity                        | N/A       | N/A                 |
| factorNaKdel           | determines voltage dependence of binding reactions                | N/A       | -0.17952 [3]        |
| flag                   | Boolean variable used to test for dvdtmax                         | N/A       | N/A                 |
| g                      | $I_{Ca,t}$ inactivation gate                                      | N/A       | N/A                 |
| $g_{\infty}$           | steady state value for g gate                                     | N/A       | N/A                 |
| $g_{Ca,b}$             | max. $I_{Ca,b}$ conductance                                       | mS/uF     | 0.003016 [1]        |
| $g_{Ca,t}$             | max. $I_{Ca,t}$ conductance                                       | mS/uF     | 0.05 [1]            |
| $g_{K(ATP)}$           | $I_{K(ATP)}$ channel conductance                                  | mS/uF     | N/A                 |
| $g_{Kp}$               | $I_{Kp}$ channel conductance                                      | mS/uF     | 0.00552 [1]         |
| $g_{Kr}$               | $I_{Kr}$ channel conductance                                      | mS/uF     | N/A                 |
| $g_{Ks}$               | $I_{Ks}$ channel conductance                                      | mS/uF     | N/A                 |
| $g_{K1}$               | $I_{K1}$ channel conductance                                      | mS/uF     | N/A                 |
| $g_{maxrel}$           | max. rate constant of $Ca^{2+}$ release from JSR                  | $ms^{-1}$ | 37.5 [1]            |
| $g_{Na}$               | max. $I_{Na}$ conductance                                         | mS/uF     | 16.0                |
|                        |                                                                   |           | (14.4 ischemia) [4] |
| $g_{Na,b}$             | max. $I_{Na,b}$ conductance                                       | mS/uF     | 0.002 [1]           |
| $g_{relbarjsrol}$      | rate constant of $Ca^{2+}$ release from JSR due to overload       | $ms^{-1}$ | 4.0 [1]             |
| $g_{reljsrol}$         | rate of constant $Ca^{2+}$ release from JSR due to CICR           | $ms^{-1}$ | N/A                 |
| gacai                  | intracellular $Ca^{2+}$ activity coefficient                      | N/A       | 1.0 [1]             |
| gacao                  | extracellular $Ca^{2+}$ activity coefficient                      | N/A       | 0.341 [1]           |
| gaki                   | intracellular $K^+$ activity coefficient                          | N/A       | 0.75 [1]            |
| gako                   | extracellular $K^+$ activity coefficient                          | N/A       | 0.75 [1]            |
| gammas                 | energy barrier controlling voltage dependence of NaCa             | N/A       | 0.12 [1]            |
| ganai                  | intracellular $Na^+$ activity coefficient                         | N/A       | 0.75 [1]            |
| ganao                  | extracellular $Na^+$ activity coefficient                         | N/A       | 0.75 [1]            |
| h                      | $I_{Na}$ inactivation gate                                        | N/A       | N/A                 |
| $h_{\infty}$           | steady state value for h gate                                     | N/A       | N/A                 |
| $[H_e^+]$              | extracellular proton concentration                                | mM        | N/A                 |
| $[H_i^+]$              | intracellular proton concentration                                | mM        | N/A                 |
| $\tilde{H}_{SERCA}$    | apparent proton binding to SERCA in SR                            | N/A       | N/A                 |
| $\tilde{H}_{i,SERCA}$  | apparent proton binding to SERCA in myoplasm                      | N/A       | N/A                 |
| $\tilde{H}_{1,SERCA}$  | apparent proton binding to SERCA in myoplasm                      | N/A       | N/A                 |
| $\tilde{H}_{SR,SERCA}$ | apparent proton binding to SERCA in SR                            | N/A       | N/A                 |
| $[HCO_{3,e}^-]$        | extracellular bicarbonate concentration                           | mM        | N/A                 |
| $[HCO_{3,i}^-]$        | intracellular bicarbonate concentration                           | mM        | N/A                 |
| $[Hib_{ref}]$          | concentration of protons bound to intrinsic buffers at start      | mM        | N/A                 |
| $[Hib_1]$              | concentration of protons bound to first generic intrinsic buffer  | mM        | N/A                 |
| $[Hib_2]$              | concentration of protons bound to second generic intrinsic buffer | mM        | N/A                 |

| Abbreviation                  | Parameter                                                       | Units            | Constant Value |
|-------------------------------|-----------------------------------------------------------------|------------------|----------------|
| $\bar{I}_{Ca}$                | max. $Ca^{2+}$ current through $I_{Ca(L)}$                      | $\mu A/\mu F$    | N/A            |
| $I_{Ca,b}$                    | background $Ca^{2+}$ current                                    | $\mu A/\mu F$    | N/A            |
| $I_{Ca(L)}$                   | L-type $Ca^{2+}$ current                                        | $\mu A/\mu F$    | N/A            |
| $I_{Ca(L),K}$                 | $K^+$ flux through $I_{Ca(L)}$                                  | $\mu A/\mu F$    | N/A            |
| $I_{Ca(L),Na}$                | $Na^+$ flux through $I_{Ca(L)}$                                 | $\mu A/\mu F$    | N/A            |
| $I_{Ca,t}$                    | T-type $Ca^{2+}$ current                                        | $\mu A/\mu F$    | N/A            |
| $I_{Ca,total}$                | total $Ca^{2+}$ flux across cell membrane                       | $\mu A/\mu F$    | N/A            |
| $I_{Cl}$                      | $Cl^-$ current                                                  | $\mu A/\mu F$    | N/A            |
| $I_{Cl,total}$                | total $Cl^-$ flux across cell membrane                          | $\mu A/\mu F$    | N/A            |
| $\bar{I}_K$                   | max. $K^+$ current through $I_{Ca(L)}$                          | $\mu A/\mu F$    | N/A            |
| $I_{K(ATP)}$                  | ATP-inactivated $K^+$ current                                   | $\mu A/\mu F$    | N/A            |
| $I_{Kp}$                      | plateau $K^+$ current                                           | $\mu A/\mu F$    | N/A            |
| $I_{Kr}$                      | rapid delayed $K^+$ rectifier current                           | $\mu A/\mu F$    | N/A            |
| $I_{Ks}$                      | slow delayed $K^+$ rectifier current                            | $\mu A/\mu F$    | N/A            |
| $I_{K1}$                      | time-independent $K^+$ rectifier current                        | $\mu A/\mu F$    | N/A            |
| $I_{K,total}$                 | total $K^+$ flux across cell membrane                           | $\mu A/\mu F$    | N/A            |
| $I_{leak}$                    | $Ca^{2+}$ leakage from NSR to myoplasm                          | mM/ms            | N/A            |
| $I_{Na}$                      | fast inward sodium current                                      | $\mu A/\mu F$    | N/A            |
| $\bar{I}_{Na}$                | max. $Na^+$ current through $I_{Ca(L)}$                         | $\mu A/\mu F$    | N/A            |
| $I_{Na,b}$                    | background sodium current                                       | $\mu A/\mu F$    | N/A            |
| $I_{NaCa}$                    | current through NaCa exchanger                                  | $\mu A/\mu F$    | N/A            |
| $I_{NaK}$                     | current through the NaK pump                                    | $\mu A/cm^2$     | N/A            |
| $I_{Na,l}$                    | late sodium current                                             | $\mu A/\mu F$    | N/A            |
| $I_{Na,total}$                | total $Na^+$ flux across cell membrane                          | $\mu A/\mu F$    | N/A            |
| $I_{p(Ca)}$                   | $Ca^{2+}$ pump current                                          | $\mu A/\mu F$    | N/A            |
| $\bar{I}_{p(Ca)}$             | max. $I_{p(Ca)}$ current                                        | $\mu A/\mu F$    | 1.65           |
| $I_{relcicr}$                 | $Ca^{2+}$ release from JSR to myoplasm due to CICR              | mM/ms            | N/A            |
| $I_{reljsrol}$                | $Ca^{2+}$ release from JSR to myoplasm due to overload          | mM/ms            | N/A            |
| $I_{stim}$                    | stimulus current                                                | $\mu A/\mu F$    | -80.0 [1]      |
| $I_{tr}$                      | translocation of $Ca^{2+}$ from NSR to JSR                      | mM/ms            | N/A            |
| $\bar{I}_{up}$                | max. flux through SERCA                                         | mM/ms            | 0.00875 [1]    |
| [ib <sub>1</sub> ]            | concentration of first generic intrinsic buffer                 | mM               | 84.22 [1]      |
| [ib <sub>2</sub> ]            | concentration of second generic intrinsic buffer                | mM               | 29.38 [1]      |
| j                             | $I_{Na}$ inactivation gate                                      | N/A              | N/A            |
| j <sub>∞</sub>                | steady state value for j gate                                   | N/A              | N/A            |
| [JSR]                         | $Ca^{2+}$ concentration in JSR                                  | mM               | N/A            |
| jsr <sub>magrel</sub>         | magnitude of $Ca^{2+}$ release                                  | N/A              | N/A            |
| jsr <sub>off</sub>            | deactivation of $Ca^{2+}$ release from JSR                      | N/A              | N/A            |
| jsr <sub>on</sub>             | activation of $Ca^{2+}$ release from JSR                        | N/A              | N/A            |
| k <sub>AE,cl</sub>            | dissociation constant (AE)                                      | mM               | 983.50 [1]     |
| k <sub>AE,hco3</sub>          | dissociation constant (AE)                                      | mM               | 110.64 [1]     |
| K <sub>AE,he</sub>            | dissociation constant (AE)                                      | mM               | 0.000312 [1]   |
| K <sub>AE,hi</sub>            | dissociation constant (AE)                                      | mM               | 0.0000267 [1]  |
| k <sup>+</sup> <sub>AE1</sub> | forward rate constant (AE)                                      | ms <sup>-1</sup> | 20,789.9 [1]   |
| k <sup>-</sup> <sub>AE1</sub> | reverse rate constant (AE)                                      | ms <sup>-1</sup> | 21,118.2 [1]   |
| k <sup>+</sup> <sub>AE2</sub> | forward rate constant (AE)                                      | ms <sup>-1</sup> | 21,256.54 [1]  |
| k <sup>-</sup> <sub>AE2</sub> | reverse rate constant (AE)                                      | ms <sup>-1</sup> | 21592.21 [1]   |
| k <sub>ATP</sub>              | k <sub>1/2</sub> for the binding of ATP to $I_{Ca(L)}$ channels | mM               | 1.4 [5]        |
| k <sub>CHE,cl</sub>           | dissociation constant (CHE)                                     | mM               | 17,970.36 [1]  |
| k <sub>CHE,oh</sub>           | dissociation constant (CHE)                                     | mM               | 0.0008907 [1]  |

| Abbreviation       | Parameter                                                        | Units           | Constant Value            |
|--------------------|------------------------------------------------------------------|-----------------|---------------------------|
| $k^+_{CHE1}$       | forward rate constant (CHE)                                      | $ms^{-1}$       | 14,975.6 [1]              |
| $k^-_{CHE1}$       | reverse rate constant (CHE)                                      | $ms^{-1}$       | 257.4 [1]                 |
| $k^+_{CHE2}$       | forward rate constant (CHE)                                      | $ms^{-1}$       | 4,084.9 [1]               |
| $k^-_{CHE2}$       | reverse rate constant (CHE)                                      | $ms^{-1}$       | 70.20 [1]                 |
| $K_{d,Cai,SERCA}$  | $K_d$ for $Ca^{2+}$ binding to SERCA in myoplasm                 | mM              | 0.91 [6]                  |
| $K_{d,CaSR,SERCA}$ | $K_d$ for $Ca^{2+}$ binding to SERCA in SERCA                    | mM              | 2.24 [6]                  |
| $K_{d,H,SERCA}$    | $K_d$ for proton binding to SERCA in SR                          | mM              | 0.0000724 [6]             |
| $K_{d,Hi,SERCA}$   | $K_d$ for proton binding to SERCA in myoplasm                    | $mM^2$          | 0.00354 [6]               |
| $K_{d,HSR,SERCA}$  | $K_d$ for proton binding to SERCA in SR                          | $mM^2$          | 0.0000000105 [6]          |
| $K_{d,H1,SERCA}$   | $K_d$ for proton binding to SERCA in myoplasm                    | mM              | 0.0000109 [6]             |
| $K_{dNaK,atp}$     | dissociation constant (NaK)                                      | mM              | 2.9263 [3]                |
| $K_{dNaK,ke}$      | dissociation constant (NaK)                                      | mM              | 6.80234 [3]               |
| $K_{dNaK,ki}$      | dissociation constant (NaK)                                      | mM              | 255.13 [3]                |
| $K_{dNaK,kpi}$     | inorganic phosphate binding constant (NaK)                       | mM              | 292.0 [3]                 |
| $K_{dNaK,nae1}$    | voltage partitioning of dissociation of 'first' $Na^+$ ion       | mM              | N/A                       |
| $K_{dNaK,nai1}$    | voltage partitioning of dissociation of 'first' $Na^+$ ion       | mM              | N/A                       |
| $K_{dNaK,nae2}$    | voltage-independent dissoc. constant for 'other two' $Na^+$ ions | mM              | 356.01 [3]                |
| $K_{dNaK,nai2}$    | voltage-independent dissoc. constant for 'other two' $Na^+$ ions | mM              | 154.39 [3]                |
| $K_{dNaK,napi}$    | inorganic phosphate binding constant (NaK)                       | mM              | 224.0 [3]                 |
| $K^0_{dNaK,nae}$   | dissoc. constant of 'first' $Na^+$ ion at 0mV                    | mM              | 141.27 [3]                |
| $K^0_{dNaK,nai}$   | dissoc. constant of 'first' $Na^+$ ion at 0mV                    | mM              | $0.12 \times 10^{-7}$ [3] |
| $[\tilde{K}_e]$    | apparent concentration of enzyme-bound ion (NaK)                 | N/A             | N/A                       |
| $k^+_{hyd}$        | forward reaction rate for $CO_2$ hyrdolysis                      | $mM^{-1}s^{-1}$ | 0.000365 [1]              |
| $k^-_{hyd}$        | reverse reaction rate for $CO_2$ hyrdolysis                      | $mM^{-1}s^{-1}$ | 0.481 [1]                 |
| $[\tilde{K}_i^+]$  | intracellular $K^+$ concentration                                | mM              | N/A                       |
| $[\tilde{K}_i]$    | apparent concentration of enzyme-bound ion (NaK)                 | N/A             | N/A                       |
| $kin$              | $I_{K1}$ inactivation                                            | N/A             | N/A                       |
| $k_{leak}$         | rate constant of $Ca^{2+}$ leakage from NSR                      | $ms^{-1}$       | N/A                       |
| $k_{m,Ca}$         | half-saturation concentration ( $I_{Ca(L)}$ )                    | mM              | 0.006 [1]                 |
| $k_{m,CMDN}$       | equilibrium constant of buffering for calmodulin                 | mM              | 0.00238 [1]               |
| $k_{m,CSQN}$       | equilibrium constant of buffering for calsequestrin              | mM              | 0.8 [1]                   |
| $k_{mp}(Ca)$       | half-saturation concentration of sarcolemmal $Ca^{2+}$ pump      | mM              | 0.0005 [1]                |
| $k_{m,TRPN}$       | equilibrium constant of buffering for troponin                   | mM              | 0.0005 [1]                |
| $k_{m,TRPNapp}$    | apparent binding constant                                        | mM              | N/A                       |
| $k_{NBC,hco3}$     | dissociation constant (NBC)                                      | mM              | 0.008017 [1]              |
| $K_{NBC,he}$       | dissociation constant (NBC)                                      | mM              | 0.0000653 [1]             |
| $K_{NBC,hi}$       | dissociation constant (NBC)                                      | mM              | 0.000183 [1]              |
| $k_{NBC,na}$       | dissociation constant (NBC)                                      | mM              | 4,866.11 [1]              |
| $k^+_{NBC1}$       | forward rate constant (NBC)                                      | $ms^{-1}$       | 3,597.7 [1]               |
| $k^-_{NBC1}$       | reverse rate constant (NBC)                                      | $ms^{-1}$       | 598.4 [1]                 |
| $k^+_{NBC2}$       | forward rate constant (NBC)                                      | $ms^{-1}$       | 5.12 [1]                  |
| $k^-_{NBC2}$       | reverse rate constant (NBC)                                      | $ms^{-1}$       | 0.8516 [1]                |
| $k_{NHE,h}$        | dissociation constant (NHE)                                      | mM              | 0.000165 [1]              |
| $K_{NHE}$          | dissociation constant (NHE)                                      | mM              | 0.0003438 [1]             |
| $k_{NHE,na}$       | dissociation constant (NHE)                                      | mM              | 33.58 [1]                 |
| $k^+_{NHE1}$       | forward rate constant (NHE)                                      | $ms^{-1}$       | 197.5 [1]                 |
| $k^-_{NHE1}$       | reverse rate constant (NHE)                                      | $ms^{-1}$       | 725.5 [1]                 |
| $k^+_{NHE2}$       | forward rate constant (NHE)                                      | $ms^{-1}$       | 44.0 [1]                  |
| $k^-_{NHE2}$       | reverse rate constant (NHE)                                      | $ms^{-1}$       | 161.63 [1]                |
| $[K_o^+]$          | extracellular $K^+$ concentration                                | mM              | N/A                       |

| Abbreviation             | Parameter                                                    | Units             | Constant Value                   |
|--------------------------|--------------------------------------------------------------|-------------------|----------------------------------|
| kp                       | $K^+$ "plateau" factor                                       | N/A               | N/A                              |
| $k^+_{1,SERCA}$          | forward rate constant (SERCA)                                | $mM^{-1}s^{-1}$   | 25,900 [6]                       |
| $k^-_{1,SERCA}$          | reverse rate constant (SERCA)                                | $mM^{-1}s^{-1}$   | 2 [6]                            |
| $k^+_{2,SERCA}$          | forward rate constant (SERCA)                                | $s^{-1}$          | 2,540 [6]                        |
| $k^-_{2,SERCA}$          | reverse rate constant (SERCA)                                | $mM^{-1}s^{-1}$   | 67,200 [6]                       |
| $k^+_{3,SERCA}$          | forward rate constant (SERCA)                                | $s^{-1}$          | 20.5 [6]                         |
| $k^-_{3,SERCA}$          | reverse rate constant (SERCA)                                | $mM^{-1}s^{-1}$   | 149 [6]                          |
| Lp                       | hydraulic conductivity of membrane                           | $L*N^{-1}*s^{-1}$ | $1.21 \times 10^{-10}$ [3]       |
| m                        | $I_{Na}$ activation gate                                     | N/A               | N/A                              |
| $m_{\infty}$             | steady state value for m gate                                | N/A               | N/A                              |
| modifier <sub>Inal</sub> | modifier to determine $I_{Na,l}$ max.conductance             | N/A               | 0.0007<br>(0.00018 ischemia) [4] |
| modifier <sub>NHE</sub>  | factor to simulate NHE inhibition                            | N/A               | N/A                              |
| $n_{AE,he}$              | Hill coefficient for binding of extracellular protons to AE  | N/A               | 1.44 [1]                         |
| $n_{AE,hi}$              | Hill coefficient for binding of intracellular protons to AE  | N/A               | 5.11 [1]                         |
| $n_{H,NaCa}$             | Hill coefficient for binding of protons to NaCa exchanger    | N/A               | 0.75                             |
| $n_{H,RYR}$              | Hill coefficient for protons inhibiting RYR                  | N/A               | 1.8668 [1]                       |
| $n_{H,TRPN}$             | Hill coefficient for binding of protons to troponin          | N/A               | 1.6524 [1]                       |
| $n_{NBC,he}$             | Hill coefficient for binding of extracellular protons to NBC | N/A               | 2.18 [1]                         |
| $n_{NBC,hi}$             | Hill coefficient for binding of intracellular protons to NBC | N/A               | 2.91 [1]                         |
| $n_{NHE,he}$             | Hill coefficient for binding of extracellular protons to NHE | N/A               | 1.00 [7]                         |
| $n_{NHE,hi}$             | Hill coefficient for binding of intracellular protons to NHE | N/A               | 3.18 [1]                         |
| $n_{SERCA}$              | number of $H^+$ transported via SERCA for every 2 $Ca^{2+}$  | N/A               | 2.0 [6]                          |
| $[\widetilde{Na_e,1}]$   | apparent concentration of enzyme-bound ion (NaK)             | N/A               | N/A                              |
| $[\widetilde{Na_e,2}]$   | apparent concentration of enzyme-bound ion (NaK)             | N/A               | N/A                              |
| $[Na_i^+]$               | intracellular $Na^+$ concentration                           | mM                | N/A                              |
| $[\widetilde{Na_i,1}]$   | apparent concentration of enzyme-bound ion (NaK)             | N/A               | N/A                              |
| $[\widetilde{Na_i,2}]$   | apparent concentration of enzyme-bound ion (NaK)             | N/A               | N/A                              |
| $[Na_o^+]$               | extracellular $Na^+$ concentration                           | mM                | N/A                              |
| $[NSR]$                  | $Ca^{2+}$ concentration in NSR                               | mM                | N/A                              |
| $[\overline{NSR}]$       | max. $[Ca^{2+}]$ in NSR                                      | mM                | 15.0 [1]                         |
| $[OH_e]$                 | extracellular hydroxide concentration                        | mM                | N/A                              |
| $[OH_i]$                 | intracellular hydroxide concentration                        | mM                | N/A                              |
| p                        | $I_{Na,l}$ activation gate                                   | N/A               | N/A                              |
| $p_{\infty}$             | steady state value for p gate                                | N/A               | N/A                              |
| $p_{atm}$                | atmospheric pressure                                         | mmHg              | 760                              |
| $p_{Ca}$                 | permeability of membrane to $Ca^{2+}$                        | cm/s              | 0.00054 [1]                      |
| $p_{Cl}$                 | membrane permeability to $Cl^-$ ions                         | cm/ms             | 0.0000001 [1]                    |
| $p_K$                    | permeability of membrane to $K^+$                            | cm/s              | 0.000000193 [1]                  |
| $p_{Na}$                 | permeability of membrane to $Na^+$                           | cm/s              | 0.000000675 [1]                  |
| $[PCr]$                  | phosphocreatine concentration                                | mM                | N/A                              |
| $pH_e$                   | extracellular pH                                             | N/A               | N/A                              |
| $pH_i$                   | intracellular pH                                             | N/A               | N/A                              |
| $pH_{ref}$               | reference pH value ("normal" pH)                             | N/A               | 7.15                             |
| $[Pi_{free}]$            | concentration of free inorganic phosphate                    | mM                | N/A                              |
| $[Pi_{NaK}]$             | concentration of free inorganic phosphate bound to NaK       | mM                | N/A                              |
| $[Pi_{total}]$           | concentration of total phosphate                             | mM                | 35.312184 [3]                    |
| $pK_{dNaK,hpi}$          | pK for inorganic phosphate binding to NaK                    | N/A               | 6.77 [3]                         |
| $pK_{H,NaCa}$            | pK for protons inhibiting NaCa exchanger                     | N/A               | 7.00                             |
| $pK_{H,RYR}$             | pK for protons inhibiting RYR                                | N/A               | 6.6396 [1]                       |



| Abbreviation                      | Parameter                                                          | Units                            | Constant Value |
|-----------------------------------|--------------------------------------------------------------------|----------------------------------|----------------|
| $pK_{H,TRPN}$                     | pK for protons binding to troponin                                 | N/A                              | 6.7914 [1]     |
| pK1                               | pK for proton binding to first generic intrinsic buffer            | N/A                              | 6.03 [1]       |
| pK2                               | pK for proton binding to second generic intrinsic buffer           | N/A                              | 7.57 [1]       |
| ppCO <sub>2</sub>                 | carbon dioxide partial pressure                                    | mmHg <sup>-1</sup>               | 0.03 [1]       |
| prnak                             | Na <sup>+</sup> /K <sup>+</sup> permeability ratio                 | N/A                              | 0.01833 [1]    |
| $\prod_e$                         | extracellular osmolarity                                           | mOsm                             | 310 [3]        |
| $\prod_i$                         | intracellular osmolarity                                           | mOsm                             | N/A            |
| [Proton <sub>ref</sub> ]          | concentration of free intracellular protons at simulation start    | mM                               | N/A            |
| R                                 | universal gas constant                                             | J/(K*kmol)                       | 8314.0 [1]     |
| rate <sup>+</sup> <sub>NaK1</sub> | baseline rate constant (NaK)                                       | s <sup>-1</sup>                  | 1664.12 [3]    |
| rate <sup>-</sup> <sub>NaK1</sub> | baseline rate constant (NaK)                                       | s <sup>-1</sup> mM <sup>-1</sup> | 264.15 [3]     |
| rate <sup>+</sup> <sub>NaK2</sub> | baseline rate constant (NaK)                                       | s <sup>-1</sup>                  | 110.42 [3]     |
| rate <sup>-</sup> <sub>NaK2</sub> | baseline rate constant (NaK)                                       | s <sup>-1</sup>                  | 14.04 [3]      |
| rate <sup>+</sup> <sub>NaK3</sub> | baseline rate constant (NaK)                                       | s <sup>-1</sup>                  | 2314.26 [3]    |
| rate <sup>-</sup> <sub>NaK3</sub> | baseline rate constant (NaK)                                       | s <sup>-1</sup> mM <sup>-2</sup> | 7599999.5 [3]  |
| rate <sup>+</sup> <sub>NaK4</sub> | baseline rate constant (NaK)                                       | s <sup>-1</sup>                  | 462.38 [3]     |
| rate <sup>-</sup> <sub>NaK4</sub> | baseline rate constant (NaK)                                       | s <sup>-1</sup>                  | 1702.53 [3]    |
| rkinac                            | time-independent I <sub>Kr</sub> inactivation gate                 | N/A                              | N/A            |
| regAE                             | modification of AE flux by extra- and intracellular protons        | N/A                              | N/A            |
| regNBC                            | modification of NBC flux by extra- and intracellular protons       | N/A                              | N/A            |
| regNHE                            | modification of NHE flux by intracellular protons                  | N/A                              | N/A            |
| s1AE                              | state occupancy probability (AE)                                   | N/A                              | N/A            |
| s1CHE                             | state occupancy probability (CHE)                                  | N/A                              | N/A            |
| s1NBC                             | state occupancy probability (NBC)                                  | N/A                              | N/A            |
| s1NHE                             | state occupancy probability (NHE)                                  | N/A                              | N/A            |
| s6AE                              | state occupancy probability (AE)                                   | N/A                              | N/A            |
| s6CHE                             | state occupancy probability (CHE)                                  | N/A                              | N/A            |
| s6NBC                             | state occupancy probability (NBC)                                  | N/A                              | N/A            |
| s6NHE                             | state occupancy probability (NHE)                                  | N/A                              | N/A            |
| t                                 | ischemic time                                                      | min.                             | N/A            |
| t <sub>cicr</sub>                 | Ca <sup>2+</sup> -induced Ca <sup>2+</sup> release timer           | ms                               | N/A            |
| t <sub>jsrol</sub>                | counter for Ca <sup>2+</sup> release from JSR due to overload      | ms                               | N/A            |
| $\tau_b$                          | time constant for b gate                                           | ms                               | N/A            |
| $\tau_d$                          | time constant for d gate                                           | ms                               | N/A            |
| $\tau_f$                          | time constant for f gate                                           | ms                               | N/A            |
| $\tau_g$                          | time constant for g gate                                           | ms                               | N/A            |
| $\tau_h$                          | time constant for h gate                                           | ms                               | N/A            |
| $\tau_j$                          | time constant for j gate                                           | ms                               | N/A            |
| $\tau_m$                          | time constant for m gate                                           | ms                               | N/A            |
| $\tau_{off}$                      | time constant of deactivation of Ca <sup>2+</sup> release from JSR | ms                               | 0.5 [1]        |
| $\tau_{on}$                       | time constant of activation of Ca <sup>2+</sup> release from JSR   | ms                               | 0.5 [1]        |
| $\tau_p$                          | time constant for p gate                                           | ms                               | N/A            |
| $\tau_{tr}$                       | time constant of Ca <sup>2+</sup> transfer from NSR to JSR         | ms                               | 180.0 [1]      |
| $\tau_{xr}$                       | time constant for xr gate                                          | ms                               | N/A            |
| $\tau_{xs1}$                      | time constant for xs1 gate                                         | ms                               | N/A            |
| $\tau_{xs2}$                      | time constant for xs2 gate                                         | ms                               | N/A            |
| temp                              | temperature                                                        | K                                | 310.0 [1]      |
| [TRPN]                            | concentration of Ca <sup>2+</sup> bound to troponin                | mM                               | N/A            |
| [TRPN]                            | max. [Ca <sup>2+</sup> ] bound to troponin                         | mM                               | 0.070 [1]      |
| V                                 | membrane voltage                                                   | mV                               | N/A            |
| V <sub>AE</sub>                   | flux through anion exchanger                                       | mM*uL*ms <sup>-1</sup>           | N/A            |

| Abbreviation                   | Parameter                                                | Units                                                 | Constant Value              |
|--------------------------------|----------------------------------------------------------|-------------------------------------------------------|-----------------------------|
| $V_{\text{CHE}}$               | flux through chloride-hydroxide exchanger                | $\text{mM} \cdot \text{uL} \cdot \text{ms}^{-1}$      | N/A                         |
| $V_{\text{CO}_2}$              | carbon dioxide flux across membrane                      | $\text{mM} \cdot \text{uL} \cdot \text{ms}^{-1}$      | N/A                         |
| $V_{\text{hyd,e}}$             | reaction rate for extracellular $\text{CO}_2$ hydrolysis | $\text{mM} \cdot \text{uL} \cdot \text{ms}^{-1}$      | N/A                         |
| $V_{\text{hyd,i}}$             | reaction rate for intracellular $\text{CO}_2$ hydrolysis | $\text{mM} \cdot \text{uL} \cdot \text{ms}^{-1}$      | N/A                         |
| $V_{\text{H}_2\text{O}}$       | movement of water across membrane                        | $\text{uL} \cdot \text{cm}^{-2} \cdot \text{ms}^{-1}$ | N/A                         |
| $V_{\text{NBC}}$               | flux through sodium-bicarbonate symporter                | $\text{mM} \cdot \text{uL} \cdot \text{ms}^{-1}$      | N/A                         |
| $V_{\text{NHE}}$               | flux through sodium-hydrogen exchanger                   | $\text{mM} \cdot \text{uL} \cdot \text{ms}^{-1}$      | N/A                         |
| $V_{\text{SERCA}}$             | SERCA flux                                               | $\text{mM}/\text{ms}$                                 | N/A                         |
| $\text{Vol}_{\text{cell}}$     | total cell volume                                        | $\text{uL}$                                           | N/A                         |
| $\text{Vol}_{\text{external}}$ | extracellular compartment volume                         | $\text{uL}$                                           | N/A                         |
| $\text{Vol}_{\text{jsr}}$      | JSR volume                                               | $\text{uL}$                                           | N/A                         |
| $\text{Vol}_{\text{myo}}$      | myoplasm volume                                          | $\text{uL}$                                           | N/A                         |
| $\text{Vol}_{\text{nsr}}$      | NSR volume                                               | $\text{uL}$                                           | N/A                         |
| $\text{Vol}_{\text{sr}}$       | SR volume                                                | $\text{uL}$                                           | N/A                         |
| $\text{Vol}_{\text{total}}$    | total cell volume                                        | $\text{uL}$                                           | $43.182 \times 10^{-6}$ [3] |
| $x_r$                          | $I_{\text{Kr}}$ inactivation gate                        | N/A                                                   | N/A                         |
| $x_{r\infty}$                  | steady state value for $x_r$ gate                        | N/A                                                   | N/A                         |
| $x_{s1}$                       | $I_{\text{Ks}}$ inactivation gate                        | N/A                                                   | N/A                         |
| $x_{s1\infty}$                 | steady state value for $x_{s1}$ gate                     | N/A                                                   | N/A                         |
| $x_{s2}$                       | $I_{\text{Ks}}$ inactivation gate                        | N/A                                                   | N/A                         |
| $x_{s2\infty}$                 | steady state value for $x_{s2}$ gate                     | N/A                                                   | N/A                         |
| $[X_e^{\text{zi-}}]$           | concentration of extracellular impermeable osmolytes     | $\text{nM}$                                           | N/A                         |
| $[X_i^{\text{zi-}}]$           | concentration of intracellular impermeable osmolytes     | $\text{nM}$                                           | N/A                         |
| $z_{\text{Ca}}$                | $\text{Ca}^{2+}$ valence                                 | N/A                                                   | 2.0                         |
| $z_{\text{Cl}}$                | $\text{Cl}^-$ valence                                    | N/A                                                   | -1.0                        |
| $z_{\text{K}}$                 | $\text{K}^+$ valence                                     | N/A                                                   | 1.0                         |
| $z_{\text{Na}}$                | $\text{Na}^+$ valence                                    | N/A                                                   | 1.0                         |

## Model Equations

$I_{Na}$

$$\alpha_m = 0.32 * \frac{V + 47.13}{1 - \exp(-0.1 * (V + 47.13))} \quad (S.1)$$

$$\beta_m = 0.08 * \exp\left(\frac{-V}{11.0}\right) \quad (S.2)$$

$$\tau_m = \frac{1}{\alpha_m + \beta_m} \quad (S.3)$$

$$m_\infty = \alpha_m * \tau_m \quad (S.4)$$

$$m_t = m_\infty - (m_\infty - m_{t-\Delta t}) * \exp\left(\frac{-\Delta t}{\tau_m}\right) \quad (S.5)$$

$$\alpha_h = 0.135 * \exp\left(\frac{-V - 80.0}{6.8}\right) \quad (S.6)$$

$$\beta_h = \frac{7.5}{1 + \exp(-0.1 * (V + 11.0))} \quad (S.7)$$

$$\tau_h = \frac{1}{\alpha_h + \beta_h} \quad (S.8)$$

$$h_\infty = \alpha_h * \tau_h \quad (S.9)$$

$$h_t = h_\infty - (h_\infty - h_{t-\Delta t}) * \exp\left(\frac{-\Delta t}{\tau_h}\right) \quad (S.10)$$

$$\alpha_j = \frac{0.175 * \exp\left(\frac{-V - 100.0}{23.0}\right)}{1.0 + \exp(0.15 * (V + 79.0))} \quad (S.11)$$

$$\beta_j = \frac{0.3}{1 + \exp(-0.1 * (V + 32.0))} \quad (S.12)$$

$$\tau_j = \frac{1}{\alpha_j + \beta_j} \quad (S.13)$$

$$j_\infty = \alpha_j * \tau_j \quad (S.14)$$

$$j_t = j_\infty - (j_\infty - j_{t-\Delta t}) * \exp\left(\frac{-\Delta t}{\tau_j}\right) \quad (S.15)$$

$$I_{Na} = g_{Na} * m^3 * h * j * (V - E_{Na}) \quad (S.16)$$

$I_{Na,b}$ 

$$I_{Na,b} = g_{Na,b} * (V - E_{Na}) \quad (S.17)$$

 $I_{Na,l}$ 

$$\alpha_p = 19.0 * \exp\left(\frac{V}{16.5}\right) \quad (S.18)$$

$$\beta_p = 0.2 * \exp\left(\frac{-V}{20.0}\right) \quad (S.19)$$

$$\tau_p = \frac{1}{\alpha_p + \beta_p} \quad (S.20)$$

$$p_\infty = \alpha_p * \tau_p \quad (S.21)$$

$$p_t = p_\infty - (p_\infty - p_{t-\Delta t}) * \exp\left(\frac{-\Delta t}{\tau_p}\right) \quad (S.22)$$

$$I_{Na,l} = \text{modifier}_{Inal} * g_{Na} * p^3 * (V - E_{Na}) \quad (S.23)$$

 $I_{Ca(L)}$ 

$$d_\infty = \frac{1}{1 + \exp\left(\frac{-V - 10}{6.24}\right)} \quad (S.24)$$

$$\tau_d = d_\infty * \frac{1 - \exp\left(\frac{-V - 10}{6.24}\right)}{0.035 * (V + 10)} \quad (S.25)$$

$$d_t = d_\infty - (d_\infty - d_{t-\Delta t}) * \exp\left(\frac{-\Delta t}{\tau_d}\right) \quad (S.26)$$

$$f_\infty = \frac{1}{1 + \exp\left(\frac{V + 32}{8}\right)} + \frac{0.6}{1 + \exp\left(\frac{50 - V}{20}\right)} \quad (S.27)$$

$$\tau_f = \frac{1}{(0.0197 * \exp(-(0.0337 * (V + 10)) * (0.0337 * (V + 10)))) + 0.02)} \quad (S.28)$$

$$f_t = f_\infty - (f_\infty - f_{t-\Delta t}) * \exp\left(\frac{-\Delta t}{\tau_f}\right) \quad (\text{S.29})$$

$$f_{\text{Ca,ATP}} = \frac{1}{1 + \left(\frac{k_{\text{ATP}}}{[\text{ATP}]}\right)^{2.6}} \quad (\text{S.30})$$

$$f_{\text{Ca}} = \frac{1}{1 + \frac{[\text{Ca}_i^{2+}]}{k_{\text{m,Ca}}}} \quad (\text{S.31})$$

$$\bar{I}_{\text{Ca}} = p_{\text{Ca}} * z_{\text{Ca}} * z_{\text{Ca}} * \frac{V * F * F}{R * \text{temp}} * \frac{\text{gacai} * [\text{Ca}_i^{2+}] * \exp\left(\frac{z_{\text{Ca}} * V * F}{R * \text{temp}}\right) - \text{gacao} * [\text{Ca}_o^{2+}]}{\exp\left(\frac{z_{\text{Ca}} * V * F}{R * \text{temp}}\right) - 1} \quad (\text{S.32})$$

$$\bar{I}_{\text{Na}} = p_{\text{Na}} * z_{\text{Na}} * z_{\text{Na}} * \frac{V * F * F}{R * \text{temp}} * \frac{\text{ganai} * [\text{Na}_i^+] * \exp\left(\frac{z_{\text{Na}} * V * F}{R * \text{temp}}\right) - \text{ganao} * [\text{Na}_o^+]}{\exp\left(\frac{z_{\text{Na}} * V * F}{R * \text{temp}}\right) - 1} \quad (\text{S.33})$$

$$\bar{I}_{\text{K}} = p_{\text{K}} * z_{\text{K}} * z_{\text{K}} * \frac{V * F * F}{R * \text{temp}} * \frac{\text{gaki} * [\text{K}_i^+] * \exp\left(\frac{z_{\text{K}} * V * F}{R * \text{temp}}\right) - \text{gako} * [\text{K}_o^+]}{\exp\left(\frac{z_{\text{K}} * V * F}{R * \text{temp}}\right) - 1} \quad (\text{S.34})$$

$$I_{\text{Ca(L)}} = f_{\text{Ca,ATP}} * d * f * f_{\text{Ca}} * \bar{I}_{\text{Ca}} \quad (\text{S.35})$$

$$I_{\text{Ca(L),Na}} = f_{\text{Ca,ATP}} * d * f * f_{\text{Ca}} * \bar{I}_{\text{Na}} \quad (\text{S.36})$$

$$I_{\text{Ca(L),K}} = f_{\text{Ca,ATP}} * d * f * f_{\text{Ca}} * \bar{I}_{\text{K}} \quad (\text{S.37})$$

$I_{\text{Ca,t}}$

$$b_\infty = \frac{1}{1 + \exp\left(\frac{-V - 14}{10.8}\right)} \quad (\text{S.38})$$

$$\tau_b = 3.7 + \frac{6.1}{1 + \exp\left(\frac{V + 25.0}{4.5}\right)} \quad (\text{S.39})$$

$$b_t = b_\infty - (b_\infty - b_{t-\Delta t}) * \exp\left(\frac{-\Delta t}{\tau_b}\right) \quad (\text{S.40})$$

$$g_\infty = \frac{1}{1 + \exp\left(\frac{V + 60.0}{5.6}\right)} \quad (\text{S.41})$$

If  $V \leq 0.0$ :

$$\tau_g = -0.875 * V + 12.0 \quad (\text{S.42})$$

Otherwise:

$$\tau_g = 12.0 \quad (\text{S.43})$$

$$g_t = g_\infty - (g_\infty - g_{t-\Delta t}) * \exp\left(\frac{-\Delta t}{\tau_g}\right) \quad (\text{S.44})$$

$$I_{Ca,t} = g_{Ca,t} * b^2 * g * (V - E_{Ca}) \quad (\text{S.45})$$

**$I_{p(Ca)}$**

$$I_{p(Ca)} = \frac{\bar{I}_{p(Ca)} * Ca_i^{2+}}{k_{mp(Ca)} + Ca_i^{2+}} \quad (\text{S.46})$$

**$I_{Ca,b}$**

$$I_{Ca,b} = g_{Ca,b} * (V - E_{Ca}) \quad (\text{S.47})$$

**JSR**

$$I_{tr} = \frac{[nsr] - [jsr]}{\tau_{tr}} \quad (\text{S.48})$$

$$dI_{Ca,total} = \frac{I_{Ca,total \ t} - I_{Ca,total \ t-\Delta t}}{\Delta t} \quad (\text{S.49})$$

$$jsr_{on} = \frac{1}{1 + \exp\left(\frac{-t_{cicr} + 4.0}{\tau_{on}}\right)} \quad (\text{S.50})$$

$$jsr_{off} = 1 - \frac{1}{1 + \exp\left(\frac{-t_{cicr} + 4.0}{\tau_{off}}\right)} \quad (\text{S.51})$$

$$j_{sr\_magrel} = \frac{1}{1 + \exp\left(\frac{I_{Ca,total} + 5.0}{0.9}\right)} \quad (S.52)$$

$$f_{aCH,RYR} = \frac{\left(\frac{1 + 10^{n_{H,RYR}(-7.4763 + pK_{H,RYR})}}{1 + 10^{n_{H,RYR}(-pH_i + pK_{H,RYR})}}\right)}{\left(\frac{1 + 10^{n_{H,RYR}(-7.4763 + pK_{H,RYR})}}{1 + 10^{n_{H,RYR}(-pH_{ref} + pK_{H,RYR})}}\right)} \quad (S.53)$$

$$I_{relcicr} = f_{aCH,RYR} * g_{maxrel} * j_{sr\_on} * j_{sr\_off} * j_{sr\_magrel} * ([JSR] - [Ca_i^{2+}]) \quad (S.54)$$

$$g_{reljsrol} = g_{relbarjsrol} * \left(1 - \exp\left(\frac{-t_{jsrol}}{\tau_{on}}\right)\right) * \exp\left(\frac{-t_{jsrol}}{\tau_{off}}\right) \quad (S.55)$$

$$I_{reljsrol} = g_{reljsrol} * ([JSR] - [Ca_i^{2+}]) \quad (S.56)$$

$$\frac{d[JSR]}{dt} = \frac{I_{tr} - I_{relcicr} - I_{reljsrol}}{\beta_{CSQN}} \quad (S.57)$$

## NSR

$$k_{leak} = \frac{\bar{I}_{up}}{[NSR]} \quad (S.58)$$

$$I_{leak} = k_{leak} * [NSR] \quad (S.59)$$

$$\frac{d[NSR]}{dt} = V_{SERCA} - I_{leak} - I_{tr} \left(\frac{Vol_{jsr}}{Vol_{nsr}}\right) \quad (S.60)$$

## SERCA

$$\widetilde{Ca}_{i,SERCA} = \frac{[Ca_i^{2+}]}{K_{d,Cai,SERCA}} \quad (S.61)$$

$$\widetilde{Ca}_{SR,SERCA} = \frac{[NSR]}{K_{d,CaSR,SERCA}} \quad (S.62)$$

$$\widetilde{H}_{i,SERCA} = \frac{[H_i^+]^{n_{SERCA}}}{K_{d,Hi,SERCA}} \quad (S.63)$$

$$\tilde{H}_{\text{SR,SERCA}} = \frac{[\text{H}_i^+]^{n_{\text{SERCA}}}}{K_{d,\text{HSR,SERCA}}} \quad (\text{S.64})$$

$$\tilde{H}_{1,\text{SERCA}} = \frac{[\text{H}]^+}{K_{d,\text{H1,SERCA}}} \quad (\text{S.65})$$

$$\tilde{H}_{\text{SERCA}} = \frac{[\text{H}]^+}{K_{d,\text{H,SERCA}}} \quad (\text{S.66})$$

$$\alpha_{1,\text{SERCA}}^+ = k_{1,\text{SERCA}}^+ [\text{ATP}] \quad (\text{S.67})$$

$$\alpha_{2,\text{SERCA}}^+ = \frac{k_{2,\text{SERCA}}^+ \tilde{\text{Ca}}_{i,\text{SERCA}}^2}{\tilde{\text{Ca}}_{i,\text{SERCA}}^2 (1 + \tilde{H}_{i,\text{SERCA}}) + \tilde{H}_{i,\text{SERCA}} (1 + \tilde{H}_{1,\text{SERCA}})} \quad (\text{S.68})$$

$$\alpha_{3,\text{SERCA}}^+ = \frac{k_{3,\text{SERCA}}^+ \tilde{H}_{\text{SR,SERCA}}}{\tilde{H}_{\text{SERCA}} (1 + \tilde{\text{Ca}}_{\text{SR,SERCA}}^2) + \tilde{H}_{\text{SR,SERCA}} (1 + \tilde{H}_{\text{SERCA}})} \quad (\text{S.69})$$

$$\alpha_{1,\text{SERCA}}^- = \frac{k_1 \tilde{H}_{i,\text{SERCA}}}{\tilde{\text{Ca}}_{i,\text{SERCA}}^2 (1 + \tilde{H}_{i,\text{SERCA}}) + \tilde{H}_{i,\text{SERCA}} (1 + \tilde{H}_{1,\text{SERCA}})} \quad (\text{S.70})$$

$$\alpha_{2,\text{SERCA}}^- = \frac{k_{2,\text{SERCA}} [\text{ADP}] \tilde{\text{Ca}}_{\text{SR,SERCA}}^2 \tilde{H}_{\text{SR,SERCA}}}{\tilde{H}_{\text{SERCA}} (1 + \tilde{\text{Ca}}_{\text{SR,SERCA}}^2) + \tilde{H}_{\text{SR,SERCA}} (1 + \tilde{H}_{\text{SERCA}})} \quad (\text{S.71})$$

$$\alpha_{3,\text{SERCA}}^- = k_{3,\text{SERCA}} [\text{Pi}_{\text{free}}] \quad (\text{S.72})$$

$$\begin{aligned} \Sigma_3 = & \alpha_{2,\text{SERCA}}^+ \alpha_{3,\text{SERCA}}^+ + \alpha_{1,\text{SERCA}}^- \alpha_{3,\text{SERCA}}^+ + \alpha_{1,\text{SERCA}}^- \alpha_{2,\text{SERCA}}^- + \\ & \alpha_{1,\text{SERCA}}^+ \alpha_{3,\text{SERCA}}^+ + \alpha_{2,\text{SERCA}}^- \alpha_{1,\text{SERCA}}^+ + \alpha_{2,\text{SERCA}}^- \alpha_{3,\text{SERCA}}^- + \\ & \alpha_{1,\text{SERCA}}^+ \alpha_{2,\text{SERCA}}^+ + \alpha_{3,\text{SERCA}}^- \alpha_{1,\text{SERCA}}^- + \alpha_{3,\text{SERCA}}^- \alpha_{2,\text{SERCA}}^+ \end{aligned} \quad (\text{S.73})$$

$$\text{cyc}_{\text{SERCA}} = \frac{\alpha_{1,\text{SERCA}}^+ \alpha_{2,\text{SERCA}}^+ \alpha_{3,\text{SERCA}}^+ - \alpha_{1,\text{SERCA}}^- \alpha_{2,\text{SERCA}}^- \alpha_{3,\text{SERCA}}^-}{\Sigma_3} \quad (\text{S.74})$$

$$V_{\text{SERCA}} = 0.00820 * \text{cyc}_{\text{SERCA}} \quad (\text{S.75})$$



## Ca<sup>2+</sup> Buffering

$$k_{m,TRPNapp} = k_{m,TRPN} \left( \frac{1 + 10^{n_{H,TRPN}(-pH_i + pK_{H,TRPN})}}{1 + 10^{n_{H,TRPN}(-pH_{ref} + pK_{H,TRPN})}} \right) \quad (S.76)$$

$$\beta_{TRPN} = 1 + \frac{[\overline{TRPN}] * k_{m,TRPNapp}}{([Ca_i^{2+}] + k_{m,TRPNapp})^2} \quad (S.77)$$

$$[TRPN] = [\overline{TRPN}] \left( \frac{[Ca_i^{2+}]}{[Ca_i^{2+}] + k_{m,TRPNapp}} \right) \quad (S.78)$$

$$\beta_{CSQN} = 1 + \frac{[\overline{CSQN}] * k_{m,CSQN}}{([JSR] + k_{m,CSQN})^2} \quad (S.79)$$

$$[CSQN] = [\overline{CSQN}] \left( \frac{[JSR]}{[JSR] + k_{m,CSQN}} \right) \quad (S.80)$$

$$\beta_{CMDN} = 1 + \frac{[\overline{CMDN}] * k_{m,CMDN}}{([Ca_i^{2+}] + k_{m,CMDN})^2} \quad (S.81)$$

$$[CMDN] = [\overline{CMDN}] \left( \frac{[Ca_i^{2+}]}{[Ca_i^{2+}] + k_{m,CMDN}} \right) \quad (S.82)$$

## I<sub>Kr</sub>

$$r_{kinac} = \frac{1}{1 + \exp\left(\frac{V + 9}{22.4}\right)} \quad (S.83)$$

$$g_{Kr} = 0.02614 \sqrt{\frac{[K_o^+]}{5.4}} \quad (S.84)$$

$$xr_{\infty} = \frac{1}{1 + \exp\left(\frac{-V - 21.5}{7.5}\right)} \quad (S.85)$$

$$\tau_{xr} = \frac{1}{\frac{0.00138 * (V + 14.2)}{(1 - \exp(-0.123 * (V + 14.2)))} + \frac{0.00061 * (V + 38.9)}{(\exp(0.145 * (V + 38.9)) - 1)}} \quad (S.86)$$

$$xr_t = xr_{\infty} - (xr_{\infty} - xr_{t-\Delta t}) * \exp\left(\frac{-\Delta t}{\tau_{xr}}\right) \quad (S.87)$$

$$I_{Kr} = g_{Kr} * xr * r_{kinac} * (V - E_K) \quad (S.88)$$

$\mathbf{I_{Ks}}$ 

$$g_{Ks} = 0.433 \left( 1 + \left( \frac{0.6}{1 + \left( \frac{0.000038}{[Ca_i^{2+}]} \right)^{1.4}} \right) \right) \quad (S.89)$$

$$xs1_{\infty} = \frac{1}{1 + \exp\left(\frac{-V + 1.5}{16.7}\right)} \quad (S.90)$$

$$\tau_{xs1} = \frac{1}{\frac{0.0000719 * (V + 30)}{(1 - \exp(-0.148 * (V + 30)))} + \frac{0.000131 * (V + 30)}{(\exp(0.0687 * (V + 30)) - 1)}} \quad (S.91)$$

$$xs1_t = xs1_{\infty} - (xs1_{\infty} - xs1_{t-\Delta t}) * \exp\left(\frac{-\Delta t}{\tau_{xs1}}\right) \quad (S.92)$$

$$xs2_{\infty} = \frac{1}{1 + \exp\left(\frac{-V + 1.5}{16.7}\right)} \quad (S.93)$$

$$\tau_{xs2} = \frac{4}{\frac{0.0000719 * (V + 30)}{(1 - \exp(-0.148 * (V + 30)))} + \frac{0.000131 * (V + 30)}{(\exp(0.0687 * (V + 30)) - 1)}} \quad (S.94)$$

$$xs2_t = xs2_{\infty} - (xs2_{\infty} - xs2_{t-\Delta t}) * \exp\left(\frac{-\Delta t}{\tau_{xs2}}\right) \quad (S.95)$$

$$I_{Ks} = g_{Ks} * xs1 * xs2 * (V - E_{Ks}) \quad (S.96)$$

 $\mathbf{I_{K1}}$ 

$$\alpha_{K1} = \frac{1.02}{1 + \exp(0.2385(V - E_K - 59.215))} \quad (S.97)$$

$$\beta_{K1} = \frac{0.49124 * \exp(0.08032 * (V - E_K + 5.476)) + \exp(0.06175 * (V - E_K - 594.31))}{1 + \exp(-0.5143 * (V - E_K + 4.753))} \quad (S.98)$$

$$kin = \frac{\alpha_{K1}}{\alpha_{K1} + \beta_{K1}} \quad (S.99)$$

$$g_{K1} = 0.75 \sqrt{\frac{[K_o^+]}{5.4}} \quad (S.100)$$

$$I_{K1} = g_{K1} * kin * (V - E_K) \quad (S.101)$$

$I_{Kp}$ 

$$k_p = \frac{1}{1 + \exp\left(\frac{7.488 - V}{5.98}\right)} \quad (S.102)$$

$$I_{Kp} = g_{Kp} * k_p * (V - E_K) \quad (S.103)$$

 $I_{K(ATP)}$ 

$$f_{ATP} = \left(1 - \frac{[ATP]}{[ATP] + 12.0}\right)^4 \quad (S.104)$$

$$f'_{ADP} = \left(\frac{[ADP]}{[ADP] + 421.05}\right)^2 \quad (S.105)$$

$$c_{ADP} = 1 - f'_{ADP} \quad (S.106)$$

$$f_{ADP} = 1 - c_{ADP}^4 \quad (S.107)$$

$$f_{K(ATP)} = 0.08 * f_{ATP} * (1 - f_{ADP}) + 0.89 * f_{ATP} * f_{ADP} \quad (S.108)$$

$$g_{K(ATP)} = 0.4 * f_{K(ATP)} * \left(\frac{[K_o^+]}{4.5}\right)^{0.24} \quad (S.109)$$

$$I_{K(ATP)} = g_{K(ATP)} * (V - E_K) \quad (S.110)$$

**Na-Ca Exchange**

$$fac_{NaCa} = \frac{1 + 10^{n_{H,NaCa}(-pH_{ref} + pK_{H,NaCa})}}{1 + 10^{n_{H,NaCa}(-pH_i + pK_{H,NaCa})}} \quad (S.111)$$

$$I_{NaCa} = c1 * fac_{NaCa} * \exp\left(\frac{(\gamma - 1) * V * F}{R * temp}\right) * \left(\frac{\exp\left(\frac{V * F}{R * temp}\right) [Na_i^+]^3 * [Ca_o^{2+}] - [Na_o^+]^3 * [Ca_i^{2+}]}{1 + c2 * \exp\left(\frac{(\gamma - 1) * V * F}{R * temp}\right) * \exp\left(\frac{V * F}{R * temp}\right) * [Na_i^+]^3 * [Ca_o^{2+}] + [Na_o^+]^3 * [Ca_i^{2+}]}\right) \quad (S.112)$$

## NaK Pump

$$K_{\text{dNaK,nae1}} = K_{\text{dNaK,nae}}^0 * \exp \left( \frac{(1 + \text{factorNaKdel}) * F * V}{R * \text{temp}} \right) \quad (\text{S.113})$$

$$K_{\text{dNaK,nai1}} = K_{\text{dNaK,nai}}^0 * \exp \left( \frac{(1 + \text{factorNaKdel}) * F * V}{R * \text{temp}} \right) \quad (\text{S.114})$$

$$[\widetilde{\text{Na}}_{\text{e},1}] = \frac{[\text{Na}_{\text{o}}^+]}{K_{\text{dNaK,nae1}}} \quad (\text{S.115})$$

$$[\widetilde{\text{Na}}_{\text{i},1}] = \frac{[\text{Na}_{\text{i}}^+]}{K_{\text{dNaK,nai1}}} \quad (\text{S.116})$$

$$[\widetilde{\text{Na}}_{\text{e},2}] = \frac{[\text{Na}_{\text{o}}^+]}{K_{\text{dNaK,nae2}}} \quad (\text{S.117})$$

$$[\widetilde{\text{Na}}_{\text{i},2}] = \frac{[\text{Na}_{\text{i}}^+]}{K_{\text{dNaK,nai2}}} \quad (\text{S.118})$$

$$[\widetilde{\text{K}}_{\text{e}}] = \frac{[\text{K}_{\text{o}}^+]}{K_{\text{dNaK,ke}}} \quad (\text{S.119})$$

$$[\widetilde{\text{K}}_{\text{i}}] = \frac{[\text{K}_{\text{i}}^+]}{K_{\text{dNaK,ki}}} \quad (\text{S.120})$$

$$[\widetilde{\text{ATP}}] = \frac{[\text{ATP}]}{K_{\text{dNaK,atp}}} \quad (\text{S.121})$$

$$[\text{Pi}_{\text{NaK}}] = \left( \frac{[\text{Pi}_{\text{free}}]}{1 + \frac{[\text{K}_{\text{i}}^+]}{K_{\text{dNaK,kpi}}} + \frac{[\text{H}_{\text{i}}^+]}{10^{3-\text{pK}_{\text{dNaK,hpi}}}} + \frac{[\text{Na}_{\text{i}}^+]}{K_{\text{dNaK,napi}}}} \right) \quad (\text{S.122})$$

$$\alpha_{\text{NaK1}}^+ = \text{rate}_{\text{NaK1}}^+ * [\widetilde{\text{Na}}_{\text{i},1}] * \frac{[\widetilde{\text{Na}}_{\text{i},2}]^2}{(1 + [\widetilde{\text{Na}}_{\text{i},1}]) * (1 + [\widetilde{\text{Na}}_{\text{i},2}])^2 + (1 + [\widetilde{\text{K}}_{\text{i}}])^2 - 1} \quad (\text{S.123})$$

$$\alpha_{\text{NaK2}}^+ = \text{rate}_{\text{NaK2}}^+ \quad (\text{S.124})$$

$$\alpha_{\text{NaK3}}^+ = \text{rate}_{\text{NaK3}}^+ * \frac{[\widetilde{\text{K}}_{\text{e}}]^2}{(1 + [\widetilde{\text{Na}}_{\text{e},1}]) * (1 + [\widetilde{\text{Na}}_{\text{e},2}])^2 + (1 + [\widetilde{\text{K}}_{\text{e}}])^2 - 1} \quad (\text{S.125})$$

$$\alpha_{\text{NaK4}}^+ = \text{rate}_{\text{NaK4}}^+ * \frac{[\widetilde{\text{ATP}}]}{1 + [\widetilde{\text{ATP}}]} \quad (\text{S.126})$$

$$\alpha_{\text{NaK1}}^- = \text{rate}_{\text{NaK1}}^- * [\text{ADP}] \quad (\text{S.127})$$

$$\alpha_{\text{NaK2}}^- = \text{rate}_{\text{NaK2}}^- * \frac{[\widetilde{\text{Na}}_{\text{e},1}] * [\widetilde{\text{Na}}_{\text{e},2}]^2}{(1 + [\widetilde{\text{Na}}_{\text{e},1}]) * (1 + [\widetilde{\text{Na}}_{\text{e},2}])^2 + (1 + [\widetilde{\text{K}}_{\text{e}}])^2 - 1} \quad (\text{S.128})$$

$$\alpha_{\text{NaK3}}^- = \text{rate}_{\text{NaK3}}^- * \frac{[\text{Pi}_{\text{NaK}}] * [\text{H}_i^+]}{1 + [\widetilde{\text{ATP}}]} \quad (\text{S.129})$$

$$\alpha_{\text{NaK4}}^- = \text{rate}_{\text{NaK4}}^- * \frac{[\widetilde{\text{K}}_i]^2}{(1 + [\widetilde{\text{Na}}_{\text{i},1}]) * (1 + [\widetilde{\text{Na}}_{\text{i},2}])^2 + (1 + [\widetilde{\text{K}}_i])^2 - 1} \quad (\text{S.130})$$

$$\begin{aligned} \Sigma_{\text{NaK}} = & \alpha_{\text{NaK1}}^- \alpha_{\text{NaK2}}^- \alpha_{\text{NaK3}}^- + \alpha_{\text{NaK1}}^- \alpha_{\text{NaK2}}^- \alpha_{\text{NaK4}}^+ + \alpha_{\text{NaK1}}^- \alpha_{\text{NaK3}}^+ \alpha_{\text{NaK4}}^+ + \alpha_{\text{NaK2}}^+ \alpha_{\text{NaK3}}^+ \alpha_{\text{NaK4}}^+ + \\ & \alpha_{\text{NaK2}}^- \alpha_{\text{NaK3}}^- \alpha_{\text{NaK4}}^- + \alpha_{\text{NaK1}}^+ \alpha_{\text{NaK2}}^- \alpha_{\text{NaK3}}^- + \alpha_{\text{NaK1}}^+ \alpha_{\text{NaK2}}^- \alpha_{\text{NaK4}}^+ + \alpha_{\text{NaK1}}^+ \alpha_{\text{NaK3}}^+ \alpha_{\text{NaK4}}^+ + \\ & \alpha_{\text{NaK1}}^- \alpha_{\text{NaK3}}^- \alpha_{\text{NaK4}}^- + \alpha_{\text{NaK2}}^+ \alpha_{\text{NaK3}}^- \alpha_{\text{NaK4}}^- + \alpha_{\text{NaK1}}^+ \alpha_{\text{NaK2}}^+ \alpha_{\text{NaK3}}^- + \alpha_{\text{NaK1}}^+ \alpha_{\text{NaK2}}^+ \alpha_{\text{NaK4}}^+ + \\ & \alpha_{\text{NaK1}}^- \alpha_{\text{NaK2}}^- \alpha_{\text{NaK4}}^- + \alpha_{\text{NaK1}}^- \alpha_{\text{NaK3}}^+ \alpha_{\text{NaK4}}^- + \alpha_{\text{NaK2}}^+ \alpha_{\text{NaK3}}^+ \alpha_{\text{NaK4}}^- + \alpha_{\text{NaK1}}^+ \alpha_{\text{NaK2}}^+ \alpha_{\text{NaK3}}^+ \end{aligned} \quad (\text{S.131})$$

$$\text{cyc}_{\text{NaK}} = \frac{\alpha_{\text{NaK1}}^+ \alpha_{\text{NaK2}}^+ \alpha_{\text{NaK3}}^+ \alpha_{\text{NaK4}}^+ - \alpha_{\text{NaK1}}^- \alpha_{\text{NaK2}}^- \alpha_{\text{NaK3}}^- \alpha_{\text{NaK4}}^-}{\Sigma_{\text{NaK}}} \quad (\text{S.132})$$

$$\text{I}_{\text{NaK}} = .000016 * \text{density}_{\text{NaK}} * \text{cyc}_{\text{NaK}} \quad (\text{S.133})$$

**I<sub>Cl</sub>**

$$\text{I}_{\text{Cl}} = \text{p}_{\text{Cl}} * \frac{\text{F}^2 * \text{V}}{\text{R} * \text{temp}} * \frac{[\text{Cl}_i^-] - [\text{Cl}_e^-] * \exp\left(\frac{\text{F} * \text{V}}{\text{R} * \text{temp}}\right)}{1 - \exp\left(\frac{\text{F} * \text{V}}{\text{R} * \text{temp}}\right)} \quad (\text{S.134})$$

**Anion Exchanger**

$$\text{aa}_{\text{AE}} = 1 + \frac{\text{k}_{\text{AE,hco3}}}{[\text{HCO}_{3,\text{e}}^-]} + \frac{\text{k}_{\text{AE,hco3}} * [\text{Cl}_e^-]}{[\text{HCO}_{3,\text{e}}^-] * \text{k}_{\text{AE,cl}}} \quad (\text{S.135})$$

$$\text{bb}_{\text{AE}} = 1 + \frac{\text{k}_{\text{AE,cl}}}{[\text{Cl}_e^-]} + \frac{\text{k}_{\text{AE,cl}} * [\text{HCO}_{3,\text{e}}^-]}{[\text{Cl}_e^-] * \text{k}_{\text{AE,hco3}}} \quad (\text{S.136})$$

$$cc_{AE} = 1 + \frac{k_{AE,cl}}{[Cl_i^-]} + \frac{k_{AE,cl} * [HCO_{3,i}^-]}{[Cl_i^-] * k_{AE,hco3}} \quad (S.137)$$

$$dd_{AE} = 1 + \frac{k_{AE,hco3}}{[HCO_{3,i}^-]} + \frac{k_{AE,hco3} * [Cl_i^-]}{[HCO_{3,i}^-] * k_{AE,cl}} \quad (S.138)$$

$$s1_{AE} = \frac{1}{aa_{AE} + dd_{AE} * \frac{k_{AE1}^+ + k_{AE2}^+ \left( \frac{aa_{AE}}{bb_{AE}} \right)}{k_{AE1}^- + k_{AE2}^- \left( \frac{dd_{AE}}{cc_{AE}} \right)}} \quad (S.139)$$

$$s6_{AE} = \frac{1}{dd_{AE} + aa_{AE} * \frac{k_{AE1}^- + k_{AE2}^- \left( \frac{dd_{AE}}{cc_{AE}} \right)}{k_{AE1}^+ + k_{AE2}^+ \left( \frac{aa_{AE}}{bb_{AE}} \right)}} \quad (S.140)$$

$$reg_{AE} = \left( \frac{K_{AE,hi}^{n_{AE,hi}}}{([H_i^+]^{n_{AE,hi}} + K_{AE,hi}^{n_{AE,hi}})} \right) * \left( \frac{[H_e^+]^{n_{AE,he}}}{([H_e^+]^{n_{AE,he}} + K_{AE,he}^{n_{AE,he}})} \right) \quad (S.141)$$

$$V_{AE} = Vol_{myo} * reg_{AE} * \frac{k_{AE1}^- * s6_{AE} - k_{AE1}^+ * s1_{AE}}{60,000} \quad (S.142)$$

### Sodium-Bicarbonate Symporter

$$aa_{NBC} = 1 + \frac{[Na_o^+]}{k_{NBC,na}} + \frac{[Na_o^+] * [HCO_{3,e}^-]}{k_{NBC,na} * k_{NBC,hco3}} \quad (S.143)$$

$$bb_{NBC} = 1 + \frac{k_{NBC,hco3}}{[HCO_{3,e}^-]} + \frac{k_{NBC,na} * k_{NBC,hco3}}{[HCO_{3,e}^-] * [Na_o^+]} \quad (S.144)$$

$$cc_{NBC} = 1 + \frac{k_{NBC,hco3}}{[HCO_{3,i}^-]} + \frac{k_{NBC,na} * k_{NBC,hco3}}{[HCO_{3,i}^-] * [Na_i^+]} \quad (S.145)$$

$$dd_{NBC} = 1 + \frac{[Na_i^+]}{k_{NBC,na}} + \frac{[Na_i^+] * [HCO_{3,i}^-]}{k_{NBC,na} * k_{NBC,hco3}} \quad (S.146)$$

$$s1_{NBC} = \frac{1}{aa_{NBC} + dd_{NBC} * \frac{k_{NBC1}^+ + k_{NBC2}^+ \left( \frac{aa_{NBC}}{bb_{NBC}} \right)}{k_{NBC1}^- + k_{NBC2}^- \left( \frac{dd_{NBC}}{cc_{NBC}} \right)}} \quad (S.147)$$

$$s6_{NBC} = \frac{1}{dd_{NBC} + aa_{NBC} * \frac{k_{NBC1}^- + k_{NBC2}^- \left( \frac{dd_{NBC}}{cc_{NBC}} \right)}{k_{NBC1}^+ + k_{NBC2}^+ \left( \frac{aa_{NBC}}{bb_{NBC}} \right)}} \quad (S.148)$$

$$reg_{NBC} = \left( \frac{[H_i^+]^{n_{NBC,hi}}}{([H_i^+]^{n_{NBC,hi}} + K_{NBC,hi}^{n_{NBC,hi}})} \right) * \left( 1 - \left( \frac{[H_e^+]^{n_{NBC,he}}}{([H_e^+]^{n_{NBC,he}} + K_{NBC,he}^{n_{NBC,he}})} \right) \right) \quad (S.149)$$

$$V_{NBC} = Vol_{myo} * reg_{NBC} * \frac{k_{NBC1}^- * s6_{NBC} - k_{NBC1}^+ * s1_{NBC}}{60,000} \quad (S.150)$$

### Chloride-Hydroxide Exchanger

$$aa_{CHE} = 1 + \frac{k_{CHE,oh}}{[OH_e^-]} + \frac{k_{CHE,oh} * [Cl_e^-]}{[OH_e^-] * k_{CHE,cl}} \quad (S.151)$$

$$bb_{CHE} = 1 + \frac{k_{CHE,cl}}{[Cl_e^-]} + \frac{k_{CHE,cl} * [OH_e^-]}{[Cl_e^-] * k_{CHE,oh}} \quad (S.152)$$

$$cc_{CHE} = 1 + \frac{k_{CHE,cl}}{[Cl_i^-]} + \frac{k_{CHE,cl} * [OH_i^-]}{[Cl_i^-] * k_{CHE,oh}} \quad (S.153)$$

$$dd_{CHE} = 1 + \frac{k_{CHE,oh}}{[OH_i^-]} + \frac{k_{CHE,oh} * [Cl_i^-]}{[OH_i^-] * k_{CHE,cl}} \quad (S.154)$$

$$s1_{CHE} = \frac{1}{aa_{CHE} + dd_{CHE} * \frac{k_{CHE1}^+ + k_{CHE2}^+ \left( \frac{aa_{CHE}}{bb_{CHE}} \right)}{k_{CHE1}^- + k_{CHE2}^- \left( \frac{dd_{CHE}}{cc_{CHE}} \right)}} \quad (S.155)$$

$$s6_{CHE} = \frac{1}{dd_{CHE} + aa_{CHE} * \frac{k_{CHE1}^- + k_{CHE2}^- \left( \frac{dd_{CHE}}{cc_{CHE}} \right)}{k_{CHE1}^+ + k_{CHE2}^+ \left( \frac{aa_{CHE}}{bb_{CHE}} \right)}} \quad (S.156)$$

$$V_{CHE} = Vol_{myo} * \frac{k_{CHE1}^- * s6_{CHE} - k_{CHE1}^+ * s1_{CHE}}{60,000} \quad (S.157)$$

## Sodium-Hydrogen Exchanger

$$aa_{NHE} = 1 + \frac{k_{NHE,h}}{[H_e^+]} + \frac{k_{NHE,h} * [Na_o^+]}{[H_e^+] * k_{NHE,na}} \quad (S.158)$$

$$bb_{NHE} = 1 + \frac{k_{NHE,na}}{[Na_o^+]} + \frac{k_{NHE,na} * [H_e^+]}{[Na_o^+] * k_{NHE,h}} \quad (S.159)$$

$$cc_{NHE} = 1 + \frac{k_{NHE,na}}{[Na_i^+]} + \frac{k_{NHE,na} * [H_i^+]}{[Na_i^+] * k_{NHE,h}} \quad (S.160)$$

$$dd_{NHE} = 1 + \frac{k_{NHE,h}}{[H_i^+]} + \frac{k_{NHE,h} * [Na_i^+]}{[H_i^+] * k_{NHE,na}} \quad (S.161)$$

$$s1_{NHE} = \frac{1}{aa_{NHE} + dd_{NHE} * \frac{k_{NHE1}^+ + k_{NHE2}^+ \left( \frac{aa_{NHE}}{bb_{NHE}} \right)}{k_{NHE1}^- + k_{NHE2}^- \left( \frac{dd_{NHE}}{cc_{NHE}} \right)}} \quad (S.162)$$

$$s6_{NHE} = \frac{1}{dd_{NHE} + aa_{NHE} * \frac{k_{NHE1}^- + k_{NHE2}^- \left( \frac{dd_{NHE}}{cc_{NHE}} \right)}{k_{NHE1}^+ + k_{NHE2}^+ \left( \frac{aa_{NHE}}{bb_{NHE}} \right)}} \quad (S.163)$$

$$reg_{NHE} = \left( \frac{[H_i^+]^{n_{NHE,hi}}}{([H_i^+]^{n_{NHE,hi}} + K_{NHE}^{n_{NHE,hi}})} \right) * \left( 1 - \frac{[H_e^+]^{n_{NHE,he}}}{([H_e^+]^{n_{NHE,he}} + K_{NHE}^{n_{NHE,he}})} \right) \quad (S.164)$$

$$V_{NHE} = modifier_{NHE} * Vol_{myo} * reg_{NHE} * \frac{k_{NHE1}^- * s6_{NHE} - k_{NHE1}^+ * s1_{NHE}}{60,000} \quad (S.165)$$

## Carbon Dioxide

$$V_{CO_2} = 1.17 * Vol_{myo} * ([CO_{2,e}] - [CO_{2,i}]) \quad (S.166)$$

$$V_{hyd,e} = Vol_{external} (k_{hyd}^+ [CO_{2,e}] - k_{hyd}^- [HCO_{3,e}^-] [H_e^+]) \quad (S.167)$$

$$V_{hyd,i} = (Vol_{myo} + Vol_{sr}) * (k_{hyd}^+ [CO_{2,i}] - k_{hyd}^- [HCO_{3,i}^-] * [H_i^+]) \quad (S.168)$$



$$\frac{d[\text{CO}_{2,i}]}{dt} = \frac{V_{\text{CO}_2}}{\text{Vol}_{\text{myo}}} - \frac{V_{\text{hyd},i}}{\text{Vol}_{\text{myo}} + \text{Vol}_{\text{sr}}} \quad (\text{S.169})$$

During pre-ischemia,  $[\text{CO}_{2,e}]$  is constant:

$$[\text{CO}_{2,e}] = \text{ppCO}_2 * \text{CO}_{2\text{sol}} * p_{\text{atm}} \quad (\text{S.170})$$

During ischemia:

$$[\text{CO}_{2,e}]_t = [\text{CO}_{2,e}]_{t-\Delta t} - \frac{V_{\text{CO}_2} + V_{\text{hyd},e}}{\text{Vol}_{\text{external}}} \Delta t \quad (\text{S.171})$$

During reperfusion:

$$[\text{CO}_{2,e}]_t = [\text{CO}_{2,e}]_{t-\Delta t} - \frac{[\text{CO}_{2,e}]_{t-\Delta t} - [\text{CO}_{2,e}]_{\text{preischemic}}}{3.75 \times 10^4} \Delta t \quad (\text{S.172})$$

## Bicarbonate

$$\frac{d[\text{HCO}_3^-]_i}{dt} = \frac{V_{\text{hyd},i}}{\text{Vol}_{\text{myo}} + \text{Vol}_{\text{sr}}} + \frac{V_{\text{NBC}} - V_{\text{AE}}}{\text{Vol}_{\text{myo}}} \quad (\text{S.173})$$

During pre-ischemia,  $[\text{HCO}_3^-]_e$  is constant. During ischemia:

$$[\text{HCO}_3^-]_t = [\text{HCO}_3^-]_{t-\Delta t} + \frac{V_{\text{hyd},e} - V_{\text{NBC}} + V_{\text{AE}}}{\text{Vol}_{\text{external}}} \Delta t \quad (\text{S.174})$$

During reperfusion:

$$[\text{HCO}_3^-]_t = [\text{HCO}_3^-]_{t-\Delta t} - \frac{[\text{HCO}_3^-]_{t-\Delta t} - [\text{HCO}_3^-]_{\text{preischemic}}}{3.75 \times 10^4} \Delta t \quad (\text{S.175})$$

## pH

$$\beta_e = \log_{10} \left( 10^{-\text{pHe}} + \frac{[\text{ib}_1] * 10^{(\text{pK1}-\text{pHe})}}{(1 + 10^{(\text{pK1}-\text{pHe})})^2} + \frac{[\text{ib}_2] * 10^{(\text{pK2}-\text{pHe})}}{(1 + 10^{(\text{pK2}-\text{pHe})})^2} \right) \quad (\text{S.176})$$

$$\beta_i = \log_{10} \left( 10^{-\text{pHi}} + \frac{[\text{ib}_1] * 10^{(\text{pK1}-\text{pHi})}}{(1 + 10^{(\text{pK1}-\text{pHi})})^2} + \frac{[\text{ib}_2] * 10^{(\text{pK2}-\text{pHi})}}{(1 + 10^{(\text{pK2}-\text{pHi})})^2} \right) \quad (\text{S.177})$$

During pre-ischemia,  $\text{pH}_e$  is constant. During ischemia:

$$\text{pH}_{e,t} = \text{pH}_{e,t-\Delta t} - \frac{1}{\beta_e} \left( \frac{V_{\text{NHE}} - V_{\text{CHE}} + V_{\text{hyd},e}}{\text{Vol}_{\text{external}}} \right) \Delta t \quad (\text{S.178})$$

During reperfusion:

$$\text{pH}_{e,t} = \text{pH}_{e,t-\Delta t} + \frac{(7.40 - \text{pH}_{e,t-\Delta t})}{1.5 \times 10^5} \Delta t \quad (\text{S.179})$$

During pre-ischemia and reperfusion:

$$\text{pH}_{i,t} = \text{pH}_{i,t-\Delta t} - \frac{1}{\beta_i} \left( \frac{-V_{\text{NHE}} + V_{\text{CHE}}}{\text{Vol}_{\text{myo}}} + \frac{V_{\text{hyd},i}}{\text{Vol}_{\text{myo}} + \text{Vol}_{\text{sr}}} \right) \Delta t \quad (\text{S.180})$$

During ischemia:

$$\text{pH}_i = 6.18507 - 0.56697e^{-0.19015t} + 1.5377e^{-0.18462t} \quad (\text{S.181})$$

## Ion Concentrations

$$[H_e^+] = 10^{(3-pH_e)} \quad (S.182)$$

$$[H_i^+] = 10^{(3-pH_i)} \quad (S.183)$$

$$[OH_e^-] = 10^{(-11+pH_e)} \quad (S.184)$$

$$[OH_i^-] = 10^{(-11+pH_i)} \quad (S.185)$$

$$I_{Na,total} = I_{Na} + I_{Na,b} + I_{Na,l} + I_{Ca(L),Na} + 3 * I_{NaK} + 3 * I_{NaCa} \quad (S.186)$$

$$I_{K,total} = I_{Kr} + I_{Ks} + I_{K1} + I_{Kp} + I_{K(ATP)} + I_{Ca(L),K} - 2 * I_{NaK} \quad (S.187)$$

$$I_{Ca,total} = I_{Ca(L)} + I_{Ca,b} + I_{Ca,t} + I_{p(Ca)} - 2 * I_{NaCa} \quad (S.188)$$

$$I_{Cl,total} = I_{Cl} \quad (S.189)$$

$$\frac{d[Na_i^+]}{dt} = \frac{-I_{Na,total} * C_m * A_{cap}}{F * z_{Na} * Vol_{myo}} + \frac{V_{NHE} + V_{NBC}}{Vol_{myo}} \quad (S.190)$$

$$\frac{d[K_i^+]}{dt} = \frac{-(I_{K,total} + I_{stim}) * C_m * A_{cap}}{F * z_K * Vol_{myo}}, \quad (S.191)$$

$$\beta_{cai} = \beta_{TRPN} + \beta_{CMDN} - 1 \quad (S.192)$$

$$\frac{d[Ca_i^{2+}]}{dt} = -\frac{1}{\beta_{cai}} \left( \frac{I_{Ca,total} * C_m * A_{cap}}{F * z_{Ca} * Vol_{myo}} + \left( (V_{SERCA} - I_{leak}) \frac{Vol_{nsr}}{Vol_{myo}} \right) - \left( (I_{relcicr} + I_{reljsrol}) \frac{Vol_{jsr}}{Vol_{myo}} \right) \right) \quad (S.193)$$

$$\frac{d[Cl_i^-]}{dt} = \frac{-I_{Cl,total} * C_m * A_{cap}}{F * z_{Cl} * Vol_{myo}} + \frac{V_{CHE} + V_{AE}}{Vol_{myo}} \quad (S.194)$$

During pre-ischemia,  $[Na^+]_o$ ,  $[K^+]_o$ , and  $[Ca^{2+}]_o$  are constant. During ischemia:

$$[Na_o^+]_t = [Na_o^+]_{t-\Delta t} + \left( \frac{I_{Na,total} * C_m * A_{cap}}{F * z_{Na} * Vol_{external}} - \frac{V_{NHE} + V_{NBC}}{Vol_{external}} \right) \Delta t \quad (S.195)$$

$$[K_o^+]_t = [K_o^+]_{t-\Delta t} + \frac{I_{K,total} * C_m * A_{cap}}{F * z_K * Vol_{external}} \Delta t \quad (S.196)$$

$$[Ca_o^{2+}]_t = [Ca_o^{2+}]_{t-\Delta t} + \frac{I_{Ca,total} * C_m * A_{cap}}{F * z_{Ca} * Vol_{external}} \Delta t \quad (S.197)$$

During reperfusion:

$$[Na_o^+]_t = [Na_o^+]_{t-\Delta t} - \frac{[Na_o^+]_{t-\Delta t} - [Na_o^+]_{preischemic}}{3.75 \times 10^4} \Delta t \quad (S.198)$$

$$[K_o^+]_t = [K_o^+]_{t-\Delta t} - \frac{[K_o^+]_{t-\Delta t} - [K_o^+]_{preischemic}}{3.75 \times 10^4} \Delta t \quad (S.199)$$

$$[Ca_o^{2+}]_t = [Ca_o^{2+}]_{t-\Delta t} - \frac{[Ca_o^{2+}]_{t-\Delta t} - [Ca_o^{2+}]_{preischemic}}{3.75 \times 10^4} \Delta t \quad (S.200)$$

## Volume Regulation

During pre-ischemia,  $\prod_i$  is constant at 310.0. During ischemia:

$$\prod_i = 310 + t \quad (S.201)$$

During reperfusion:

$$\prod_{i, t} = \prod_{i, t-\Delta 1} - \frac{\prod_{i, t-\Delta t} - 310}{3.75 \times 10^4 \text{ms}} \Delta t \quad (S.202)$$

Calculated once at beginning of simulation:

$$X_e^{zi-} = Vol_{external} * \left( \prod_e -[Na_o^+] - [K_o^+] - [Ca_o^{2+}] - [Cl_e^-] \right) \quad (S.203)$$

During ischemia and reperfusion (constant during pre-ischemia):

$$X_i^{zi-} = Vol_{myo} * \left( \prod_i -[Na_i^+] - [K_i^+] - [Ca_i^{2+}] - [Cl_i^-] \right) \quad (S.204)$$

$$V_{H_2O} = 10 * Lp * R * temp * \left( ([Na_i^+] + [K_i^+] + [Ca_i^{2+}] + [Cl_i^-] + \frac{[X_i^{zi-}]}{Vol_{myo}}) - \right. \\ \left. ([Na_o^+] + [K_o^+] + [Ca_o^{2+}] + [Cl_e^-] + \frac{[X_e^{zi-}]}{Vol_{external}}) \right) \quad (S.205)$$

$$dVol_{cell} = A_{cap} * V_{H_2O} * \Delta t \quad (S.206)$$

$$Vol_{myo} = Vol_{cell} * 0.68 \quad (S.207)$$

$$Vol_{sr} = Vol_{cell} * 0.06 \quad (S.208)$$

$$Vol_{nsr} = Vol_{cell} * 0.0552 \quad (S.209)$$

$$Vol_{jsr} = Vol_{cell} * 0.0048 \quad (S.210)$$

$$Vol_{external} = Vol_{total} - Vol_{cell} \quad (S.211)$$

## Voltage Calculations

Calculate Proton<sub>ref</sub> and Hib<sub>ref</sub> at beginning of simulation:

$$[\text{Proton}_{\text{ref}}] = 10^{3-\text{pHi}} \quad (\text{S.212})$$

$$[\text{Hib}_{\text{ref}}] = \frac{[\text{ib}_1] * 10^{-\text{pHi}}}{10^{-\text{pHi}} + 10^{-\text{pK1}}} + \frac{[\text{ib}_2] * 10^{-\text{pHi}}}{10^{-\text{pHi}} + 10^{-\text{pK2}}} \quad (\text{S.213})$$

$$[\text{Hib}_1] = \frac{[\text{ib}_1] * 10^{-\text{pHi}}}{10^{-\text{pHi}} + 10^{-\text{pK1}}} \quad (\text{S.214})$$

$$[\text{Hib}_2] = \frac{[\text{ib}_2] * 10^{-\text{pHi}}}{10^{-\text{pHi}} + 10^{-\text{pK2}}} \quad (\text{S.215})$$

$$[\text{Anion}^-] = (10^{3-\text{pHi}} - [\text{Proton}_{\text{ref}}]) + ([\text{Hib}_1] + [\text{Hib}_2] - [\text{Hib}_{\text{ref}}]) \quad (\text{S.216})$$

$$\begin{aligned} C_0 = & -\frac{V * A_{\text{cap}} * C_m}{\text{Vol}_{\text{myo}} * F} + [\text{Na}_i^+] + [\text{K}_i^+] - [\text{Cl}_i^-] - [\text{HCO}_{3,i}^-] + ([\text{Proton}_{\text{ref}}] - [\text{Hib}_{\text{ref}}]) - [\text{OH}_i^-] - [\text{Anion}^-] + \\ & z_{\text{Ca}} * \left( ([\text{Ca}_i^{2+}] + [\text{TRPN}] + [\text{CMDN}]) + [\text{NSR}] * \left( \frac{\text{Vol}_{\text{nsr}}}{\text{Vol}_{\text{myo}}} \right) + ([\text{JSR}] + [\text{CSQN}]) * \left( \frac{\text{Vol}_{\text{jsr}}}{\text{Vol}_{\text{myo}}} \right) \right) \end{aligned} \quad (\text{S.217})$$

$$\begin{aligned} V = & \frac{\text{Vol}_{\text{myo}} * F}{A_{\text{cap}} * C_m} * \left( -C_0 + [\text{Na}_i^+] + [\text{K}_i^+] - [\text{Cl}_i^-] - [\text{HCO}_{3,i}^-] + ([\text{Proton}_{\text{ref}}] - [\text{Hib}_{\text{ref}}]) - [\text{OH}_i^-] - [\text{Anion}^-] + \right. \\ & \left. z_{\text{Ca}} * \left( ([\text{Ca}_i^{2+}] + [\text{TRPN}] + [\text{CMDN}]) + [\text{NSR}] * \left( \frac{\text{Vol}_{\text{nsr}}}{\text{Vol}_{\text{myo}}} \right) + ([\text{JSR}] + [\text{CSQN}]) * \left( \frac{\text{Vol}_{\text{jsr}}}{\text{Vol}_{\text{myo}}} \right) \right) \right) \end{aligned} \quad (\text{S.218})$$

$$\text{dvdtnew} = \frac{V_t - V_{\Delta t}}{\Delta t} \quad (\text{S.219})$$

## Phosphometabolites

During pre-ischemia, all metabolites are held at their initial values. During ischemia:

$$[\text{ATP}] = 0.0006549t^3 - 0.02305t^2 - 0.104837t + 7.216 \quad (\text{S.220})$$

$$[\text{PCr}] = -0.01259 + 12.339e^{-0.92559t} + 0.96819e^{-0.078496t} \quad (\text{S.221})$$

During reperfusion:

$$[\text{ATP}]_t = [\text{ATP}]_{t-\Delta t} - \frac{[\text{ATP}]_{t-\Delta t} - 0.4[\text{ATP}_{\text{preischemic}}]}{5 \times 10^3 \text{ms}} \Delta t \quad (\text{S.222})$$

$$[\text{PCr}]_t = [\text{PCr}]_{t-\Delta t} - \frac{[\text{PCr}]_{t-\Delta t} - 0.75[\text{ion}_{\text{preischemic}}]}{5 \times 10^3 \text{ms}} \Delta t \quad (\text{S.223})$$

During ischemia and reperfusion:

$$[\text{Cr}] = 22.2 - [\text{PCr}] \quad (\text{S.224})$$

$$[\text{ADP}] = \frac{[\text{ATP}] * [\text{Cr}]}{[\text{PCr}] * [\text{H}_i^+] * 1.66 \times 10^6} \quad (\text{S.225})$$

$$[\text{AMP}] = \frac{[\text{ADP}] * [\text{ADP}] * 1.05}{[\text{ATP}]} \quad (\text{S.226})$$

$$[\text{Pi}_{\text{free}}] = [\text{Pi}_{\text{total}} - (3 * [\text{ATP}] + 2 * [\text{ATP}] + [\text{AMP}] + [\text{PCr}]) \quad (\text{S.227})$$

## Miscellaneous

$$E_{\text{Na}} = \frac{R * \text{temp}}{F} * \log \left( \frac{[\text{Na}_o^+]}{[\text{Na}_i^+]} \right) \quad (\text{S.228})$$

$$E_{\text{Ca}} = \frac{R * \text{temp}}{2 * F} * \log \left( \frac{[\text{Ca}_o^{2+}]}{[\text{Ca}_i^{2+}]} \right) \quad (\text{S.229})$$

$$E_{\text{K}} = \frac{R * \text{temp}}{F} * \log \left( \frac{[\text{K}_o^+]}{[\text{K}_i^+]} \right) \quad (\text{S.230})$$

$$E_{\text{Ks}} = \frac{R * \text{temp}}{F} * \log \left( \frac{[\text{K}_o^+] + \text{prnak} * [\text{Na}_o^+]}{[\text{K}_i^+] + \text{prnak} * [\text{Na}_i^+]} \right) \quad (\text{S.231})$$

If  $\text{dvdt}_{\text{new}} > 10.0$  AND  $t_{\text{cicr}} > 10.0$  AND  $\text{flag} = \text{true}$ , then set  $\text{flag} = \text{false}$ .

If  $V > -35.0$  AND  $dI_{\text{Ca,total } t} > dI_{\text{Ca,total } t-\Delta t}$  AND  $\text{flag} = \text{false}$ , then:

set  $\text{flag} = \text{true}$

set  $t_{\text{cicr}} = 0$

If  $[\text{CSQN}] \geq \text{csqnth}$  AND  $t_{\text{jsrol}} \geq 50$ , then reset  $t_{\text{jsrol}} = 0$ .

## Notes on experimental data used in determination of model parameters

The following pertains to model parameters cited from [1]:

### **AE, CHE, NBC, and NHE:**

[8]: guinea pig papillary muscle and sheep Purkinje fiber, 34-37 degrees C.

[9]: isolated rabbit ventricular myocytes, 35-37 degrees C.

[10]: isolated guinea pig ventricular myocytes, 37 degrees C.

[11]: isolated guinea pig ventricular myocytes, 37 degrees C.

[12]: sheep Purkinje fiber, 37 degrees C.

[7]: sheep Purkinje fiber, 37 degrees C.

pH Dependence of SR Calcium Release:

[13]: canine cardiac muscle SR fractions.

### **pH Dependence of Na-Ca Exchange:**

[14]: guinea pig ventricular cell excised patches.

### **pH Dependence of Calcium Binding to Troponin:**

[15]: canine cardiac myofibrils, 22 degrees C.

[16]: XL1 cells transformed with mouse Troponin I cDNA.

### **pH Regulation:**

[17]: squid giant axon, 23 degrees C.

[18]: isolated guinea pig ventricular myocytes, 37 degrees C.

[10]: isolated guinea pig ventricular myocytes, 37 degrees C.

The following pertains to model parameters cited from [3]:

### **NaK Pump:**

Parameter values were adjusted to correspond to a temperature of 37 degrees C using a  $Q_{10}$  of 2.6.

$\text{rate}^+_{\text{NaK1}}$ ,  $\text{rate}^-_{\text{NaK1}}$ , sensitivity to  $[\text{Na}^+_{\text{o}}]$  and  $[\text{ADP}]$  [19]: isolated rat myocytes, 23 degrees C.

$\text{rate}^+_{\text{NaK2}}$ ,  $\text{rate}^-_{\text{NaK2}}$  [20]: rabbit kidney fragments adsorbed on lipid bilayers, 20 degrees C.

$\text{rate}^-_{\text{NaK3}}$  [21]: porcine kidney outer medulla, 37 degrees C.

$\text{rate}^+_{\text{NaK4}}$ ,  $\text{rate}^-_{\text{NaK4}}$  [22]: rabbit kidney outer medulla, 37 degrees C.

$\text{density}_{\text{NaK}}$  [23]: isolated guinea pig and rat myocytes, 35 degrees C.

Sensitivity to  $[\text{Na}^+_{\text{i}}]$  [24]: rabbit ventricular myocytes, 22 degrees C.

Sensitivity to membrane potential and  $[\text{K}^+_{\text{o}}]$  [25]: guinea pig membrane excised patches, 36 degrees C.

Sensitivity to changes in  $[\text{ATP}]$  [26]: guinea pig excised patches.

Other experimental data sets used:

[27–29]: isolated guinea pig ventricular myocytes, 36 degrees C.

**$\text{I}_{\text{K(ATP)}}$ :**

[30]: guinea pig ventricular myocytes, 36 degrees C.

[31]: guinea pig isolated ventricular myocytes, room temperature.

[32]: COSm6 cells transfected with mouse Kir6.2, 20-22 degrees C.

[33]: COSm6 cells transfected with mouse Kir6.2, 25 degrees C.

[34]: HEK cells transfected with Kir6.2 and SUR1.

[35]: mouse  $\text{I}_{\text{K(ATP)}}$  isolated from pancreatic beta and HIT cells.

[36]: *Xenopus* oocytes transfected with mouse Kir6.2 and rat SUR1.

[37]: COS-7 cells transfected with hamster SUR1, 20-24 degrees C.

**Volume Regulation:**

[38]: slices of canine left ventricle and papillary muscle, 37 degrees C.

[39]: porcine, transmural biopsies from intact beating heart.

**pH and phosphometabolites:**

ATP, PCr, and pH [40]: perfused guinea pig hearts, 37 degrees C.

ATP, PCr, and Cr [41]: guinea pig isolated myocytes, atria, and saline perfused hearts, 37 degrees C.

P<sub>i</sub> [42]: perfused guinea pig hearts.

The following pertains to model parameters cited from [6]:

Data from three studies were used to constrain model parameters:

[43]: Ca<sup>2+</sup><sub>i</sub> uptake versus pH (Fig. 5); mouse SERCA2a microsomes, experiments performed at 37 degrees C, [ATP] = 3mM, [ADP] = 0mM, [P<sub>i</sub>] = 0mM, [Ca<sup>2+</sup><sub>i</sub>] = 0mM, [Ca<sup>2+</sup><sub>SR</sub>] = 0.001mM.

[43]: Ca<sup>2+</sup><sub>i</sub> uptake versus [Ca<sup>2+</sup><sub>i</sub>] at different pH (Fig. 4); mouse SERCA2a microsomes, experiments performed at 37 degrees C, [ATP] = 3mM, [ADP] = 0mM, [P<sub>i</sub>] = 0mM, [Ca<sup>2+</sup><sub>i</sub>] = variable, [Ca<sup>2+</sup><sub>SR</sub>] = 0mM.

[44]: level of back phosphorylation versus [P<sub>i</sub>] (Fig. 6); rabbit SERCA1a nonnative cell expression, 25 degrees C, pH 6, [ATP] = 0mM, [ADP] = 0mM, [P<sub>i</sub>] = variable, [Ca<sup>2+</sup><sub>i</sub>] = 0mM, [Ca<sup>2+</sup><sub>SR</sub>] = 0mM.

[45]: ATPase activity versus ATP and ADP (Fig. 7), rabbit SERCA1a solubilized SR fragments, 10 degrees C, pH 7, [ATP] = variable, [ADP] = variable, [P<sub>i</sub>] = 0mM, [Ca<sup>2+</sup><sub>i</sub>] = 5mM, [Ca<sup>2+</sup><sub>SR</sub>] = 5mM.

In the absence of reliable Q<sub>10</sub> data, the authors in [6] chose normalize the data to a maximum cycle rate of 5 s<sup>-1</sup> under the following "optimal" conditions: pH = 7.2, [ATP] = 5mM, [ADP] = 0mM, [P<sub>i</sub>] = 0mM, [Ca<sup>2+</sup><sub>i</sub>] = 0mM, [Ca<sup>2+</sup><sub>SR</sub>] = 10uM.

The following pertains to model parameters cited from [5]:

The experiments used to determine k<sub>1/2</sub> for ATP binding and the Hill coefficient of 2.6 were performed using isolated guinea pig ventricular cells at a temperature between 35 and 36 degrees C [30].

The following pertains to model parameters cited from [4]:

The data used to inform alterations in sodium conductance and late sodium current came from experiments performed on isolated guinea pig myocytes at 37 degrees C [46].



## Summary of Ischemia and Reperfusion Simulation Protocols

During pre-ischemia, extracellular species and pH are held constant, the assumption being that they are in equilibrium with a much larger volume. During ischemia, when the extracellular compartment is assumed to be isolated, concentrations and pH in the extracellular compartment are allowed to vary as described by the equations cited in the table below and in Supplement 2. Also, a variable representing intracellular osmolarity is increased, favoring inward water flux, thereby increasing and decreasing the intra- and extracellular volumes, respectively. During reperfusion, when extracellular fluid is washed out and replaced with "normal" fluid from the surrounding non-ischemia tissue, we return the values representing extracellular species concentration and pH to normal over a specified time. Intracellular osmolarity is returned to normal, as well.

Also, during ischemia a decrease in intracellular pH, as well as the concentrations of ATP and phosphocreatine, are imposed on the system per the equations cited in the table below.

|                                 | Ischemia               | Reperfusion            |
|---------------------------------|------------------------|------------------------|
| $\text{pH}_i$                   | Prescribed by Eq. S181 | Calculated by Eq. S180 |
| $\text{pH}_e$                   | Calculated by Eq. S178 | Prescribed by Eq. S179 |
| $[\text{CO}_{2,e}]$             | Calculated by Eq. S171 | Prescribed by Eq. S172 |
| $[\text{HCO}_{3,e}^-]$          | Calculated by Eq. S174 | Prescribed by Eq. S175 |
| $[\text{Na}^+{}_o]$             | Calculated by Eq. S195 | Prescribed by Eq. 198  |
| $[\text{K}^+{}_o]$              | Calculated by Eq. S196 | Prescribed by Eq. 199  |
| $[\text{Ca}^{2+}{}_o]$          | Calculated by Eq. S197 | Prescribed by Eq. 200  |
| $\Pi_i$                         | Prescribed by Eq. S201 | Prescribed by Eq. S202 |
| $[\text{ATP}]$                  | Prescribed by Eq. S220 | Prescribed by Eq. S222 |
| $[\text{PCr}]$                  | Prescribed by Eq. S221 | Prescribed by Eq. S223 |
| $\text{modifier}_{\text{Inal}}$ | 0.00018                | 0.00007                |
| $g_{\text{Na}}$                 | 14.4 mS/uF             | 16.0 mS/uF             |

Table S2: Summary of ischemia and reperfusion protocols.

Data from several different experimental sources were cited in the manuscript. Details of the relevant experimental methods are provided below.

The experiments cited in discussions of intracellular pH (including Figure 3A in the manuscript), ATP and PCr [40] were performed with Langendorff-perfused female guinea pig hearts. Experiments are performed at a temperature of 37 degrees Celsius and whole hearts were perfused with standard Krebs-Henseleit buffer. Changes in pH and phosphometabolite concentrations were determined by NMR spectroscopy. Global ischemia was induced by clamping the perfusion line.

Figure 3B in the manuscript cites control data from experiments detailed in [47]. Male guinea pig hearts were used and a temperature of 37 degrees Celsius was maintained during perfusion of whole hearts. pH measurements before, during, and after global ischemia were made using a pH electrode inserted into the left ventricle. Hearts were spontaneously beating and perfused with Krebs-Henseleit solution of the following composition (in mM): NaCl 118, KCl 4.7, CaCl<sub>2</sub> 2.5, MgSO<sub>4</sub> 1.2, KH<sub>2</sub>PO<sub>4</sub> 1.2, NaHCO<sub>3</sub> 25, and glucose 10. Buffer was aerated with 95 percent oxygen/5 percent CO<sub>2</sub> (pH 7.5)

Figure 3C in the manuscript and discussions of intracellular sodium and calcium cite data from experiments performed with guinea pig hearts [48]. Calcium and sodium measurements using fluorescent dyes were made from the left ventricles of intact hearts. Hearts were perfused at a temperature of 37.2 degrees Celsius with Krebs-Ringer solution equilibrated with 97 percent oxygen/3 percent carbon dioxide (pH 7.39) and composed of the following (in mM): 137 Na<sup>+</sup>, 5 K<sup>+</sup>, 1.2 Mg<sup>2+</sup>, 2.5 Ca<sup>2+</sup>, 134 Cl<sup>-</sup>, 15.5 HCO<sub>3</sub><sup>-</sup>, 1.2 H<sub>2</sub>PO<sub>4</sub><sup>-</sup>, 11.5 glucose, 2 pyruvate, 16 mannitol, 0.05 EDTA, 0.1 probenecid, and 5U/l insulin.

The porcine experiment cited in the discussion of extracellular pH recovery [49] consisted of using pH-sensitive electrodes inserted into the LAD of hearts in live anesthetized pigs, ventilated to maintain arterial oxygen saturation greater than 95 percent, arterial P<sub>CO<sub>2</sub></sub> 35-45 mm Hg, and arterial pH at 7.35-7.45. Within the same discussion, canine data was referenced from a study [50] in which pH measurements were made using a blood gas analyzer from coronary venous blood samples. The dogs in this study were anesthetized and the arterial pH, P<sub>O<sub>2</sub></sub> and P<sub>CO<sub>2</sub></sub> before the start of experimental protocols were 7.40, 104 mm Hg, and 37.5 mm Hg, respectively.

The estimate of how much time is required for extracellular ions to return to preischemic concentrations comes from measurements of extracellular potassium made in Langendorff-perfused guinea pig hearts [51]. Ischemia was induced by clamping of the aorta. Ion concentrations were made either by flame photometry or an ion-selective probe. The temperature range was 31-33 degrees Celsius, although temperature was reported to remain constant during individual experiments. Perfusion fluid contained washed bovine erythrocytes (hemoglobin concentration of 8 g/100 ml), dextran (mol wt of 70,000, 4 g/100 ml), insulin (1 U/l), heparin (400 U/l) and Tyrode's solution of the following composition (in mM): Na<sup>+</sup> 149, K<sup>+</sup> 4.5, Mg<sup>2+</sup> 0.49, Ca<sup>2+</sup> 1.8, Cl<sup>-</sup> 145.8, HCO<sub>3</sub><sup>-</sup> 11.9, H<sub>2</sub>PO<sub>4</sub><sup>-</sup> 0.4, and glucose, 20. pH was between 7.34 and 7.37.

## Figure Legends

### Figure S1.

Analysis of sodium influx under three different conditions. (A) Sodium influx through all seven components in the model quantified as the change in concentration per minute that would occur in the absence of equivalent efflux via the sodium-potassium exchanger. (B) Percentage of total sodium influx through each of the seven components. For each of the three conditions, the model was allowed to reach steady state and sodium current through each of the seven components was analyzed for the last minute of the simulation. The model was either paced continuously at a rate of 1 Hz under pre-ischemic conditions (blue), was left at rest under pre-ischemic conditions (red), or was left at rest with intracellular pH set to 6.9 (green). As was expected, total sodium influx was highest when the cell was paced, and was higher at rest during mild acidosis than normal pH, due in part to increased flux through the sodium-hydrogen exchanger (NHE) and sodium-bicarbonate symporter (NBC) under acidosis. Also, as expected, there was less sodium-calcium exchange (NCX) activity when the cell was at rest, and even less when the resting cell experienced a lower pH. Other abbreviations: fast inward sodium current (INa), background sodium current (INa,b), late sodium current (INa,l), and sodium current through the L-type calcium channel (Ilcana).

### Figure S2.

Intracellular sodium concentration profiles from simulations performed with the aim of investigating strategies that may improve  $[Na]_i$  overload during reperfusion. The default ischemia-reperfusion simulation is provided as a reference (black). In the simulation shown in blue, ATP concentration was allowed to recover to the preischemic value during reperfusion (using the same constant), as opposed to being restricted to a maximum recovery of 40 percent of the preischemic value. In the simulation shown in green, NaK exchanger activity was doubled, starting at the moment of initial reperfusion. Both strategies markedly reduced the amount of  $[Na]_i$  overload during reperfusion.

### Figure S3.

Results of a sensitivity analysis of the sodium-potassium exchanger. For each simulation, one of 20 fixed parameters was deviated 10 percent above or below the default value and the model was run until it reached steady state, at which point the intracellular sodium concentration was recorded. Sensitivity values are reported for each of the 20 parameters. The value on the vertical axis represents the percent change in steady state concentration that results when a given parameter is increased by 1 percent. For example, the most sensitive parameter, the binding constant named  $K_{dNaK, nai2}$ , would cause a 0.62 percent increase in steady state sodium concentration when increased by 1 percent. Parameter names, values, units, and meanings can be found in Supplement 1: Symbols and Values.

### Figure S4.

The relationship between pacing frequency and steady state intracellular sodium concentration in two models and experimental data. Steady state sodium concentrations at different frequencies are compared between the present model (blue), the LRd model of guinea pig cardiomyocyte physiology (red), and data obtained from guinea pig papillary muscle (Wang *et al*, 1998) (black). Numbers for the LRd results and Wang experimental data were extracted from Figure 4 of [52] using DigitizeIt software (share-it!, Denmark).

**Figure S5.**

Extracellular pH (A) and intracellular sodium concentration (B) during simulated ischemia (gray region) and reperfusion. Identical conditions were simulated with versions of the model that lacked allosteric NHE regulation by extracellular protons (black) and with extracellular regulation implemented (blue). The cell was constantly simulated at a rate of 3 Hz in both simulations. Experimental studies suggest that after 20 minutes of ischemia, extracellular pH decreases to about 6.0 (see Figure 3 in the manuscript). Implementation of extracellular NHE regulation, in which flux is reduced as extracellular pH decreases, improves the extracellular pH profile of our model, reaching approximately 5.8 after 20 minutes of ischemia, (up from approximately 5.4), and exhibiting a less steep decrease in early ischemia, consistent with the data shown in Figure 3. However, at this pacing frequency, the initial accumulation of intracellular sodium during early ischemia is lost as extracellular acidosis develops and NHE flux decreases.

**A**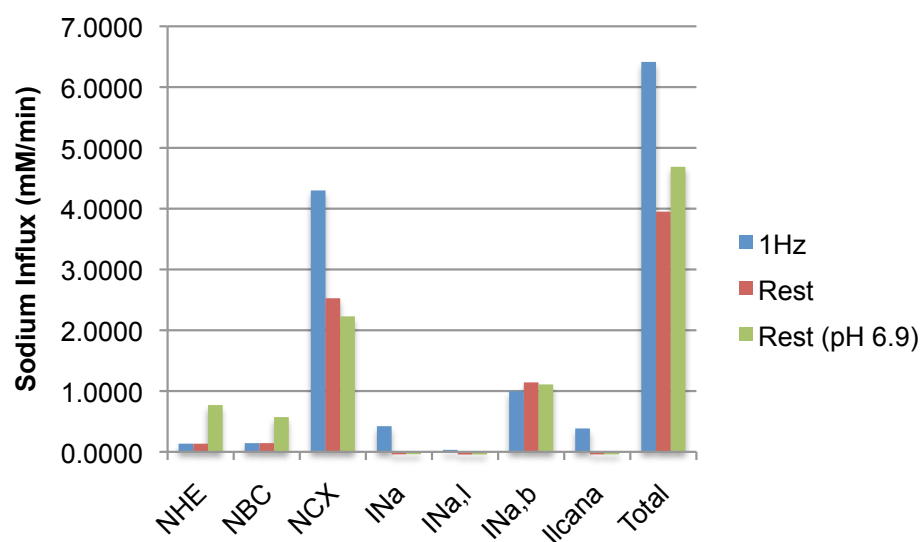**B**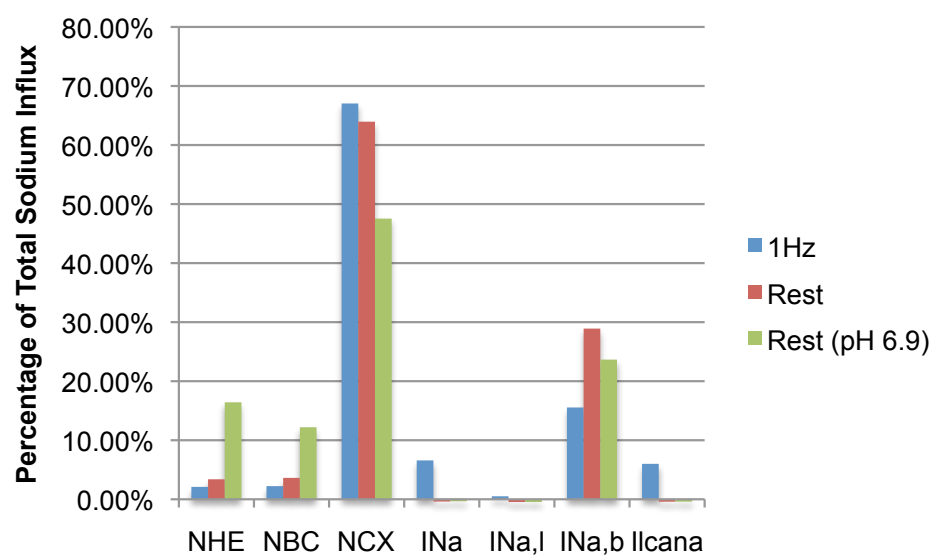

Figure S1:

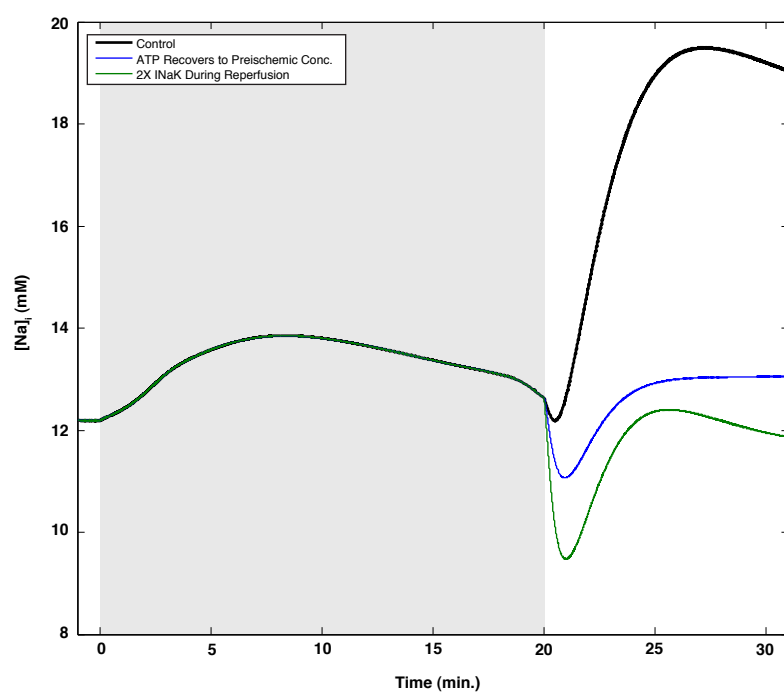

Figure S2:

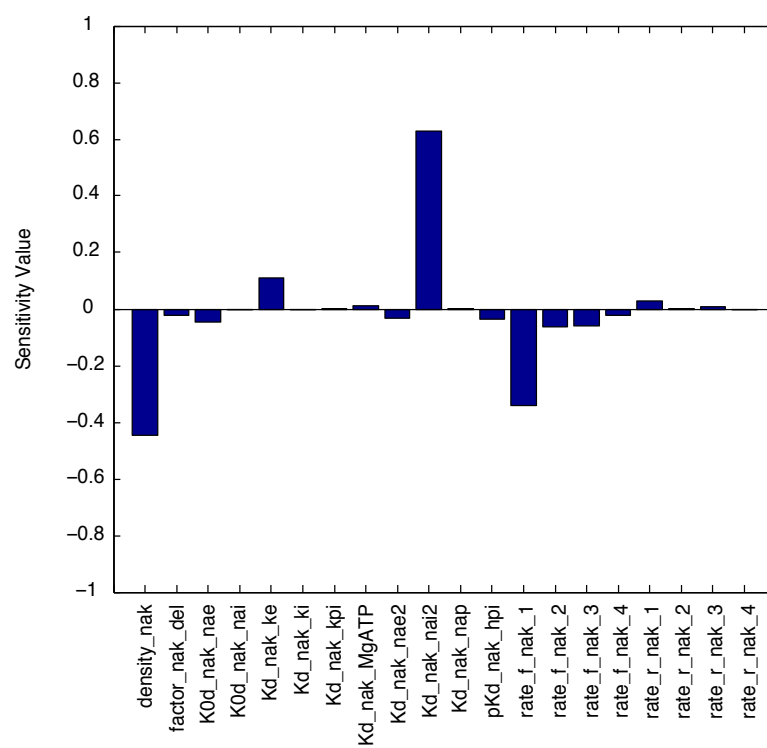

Figure S3:

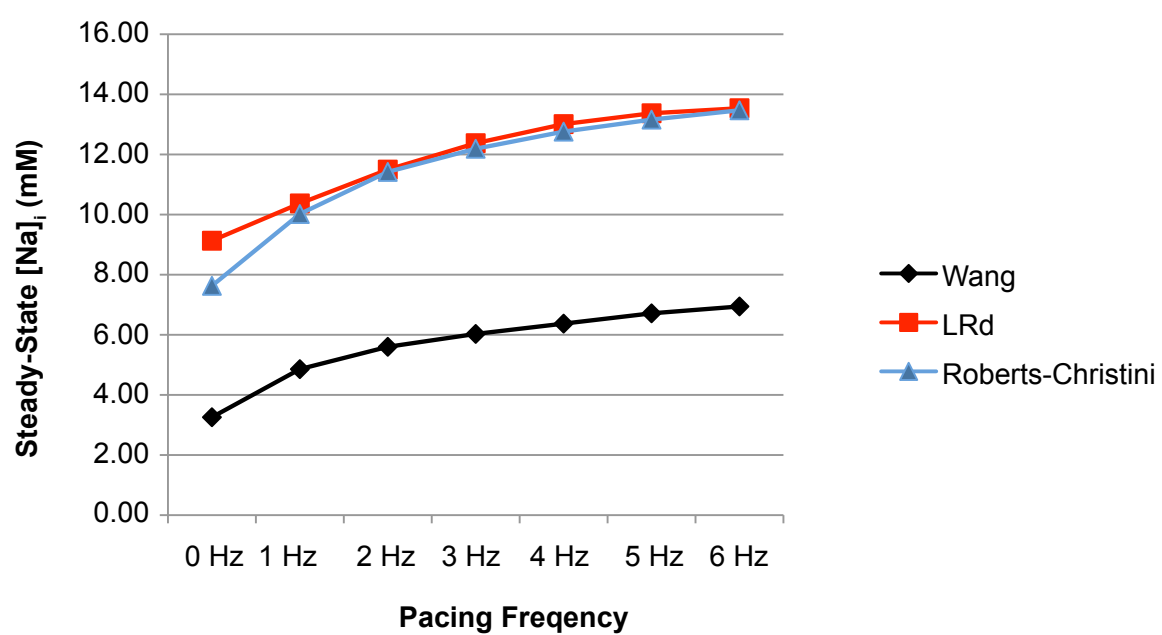

Figure S4:



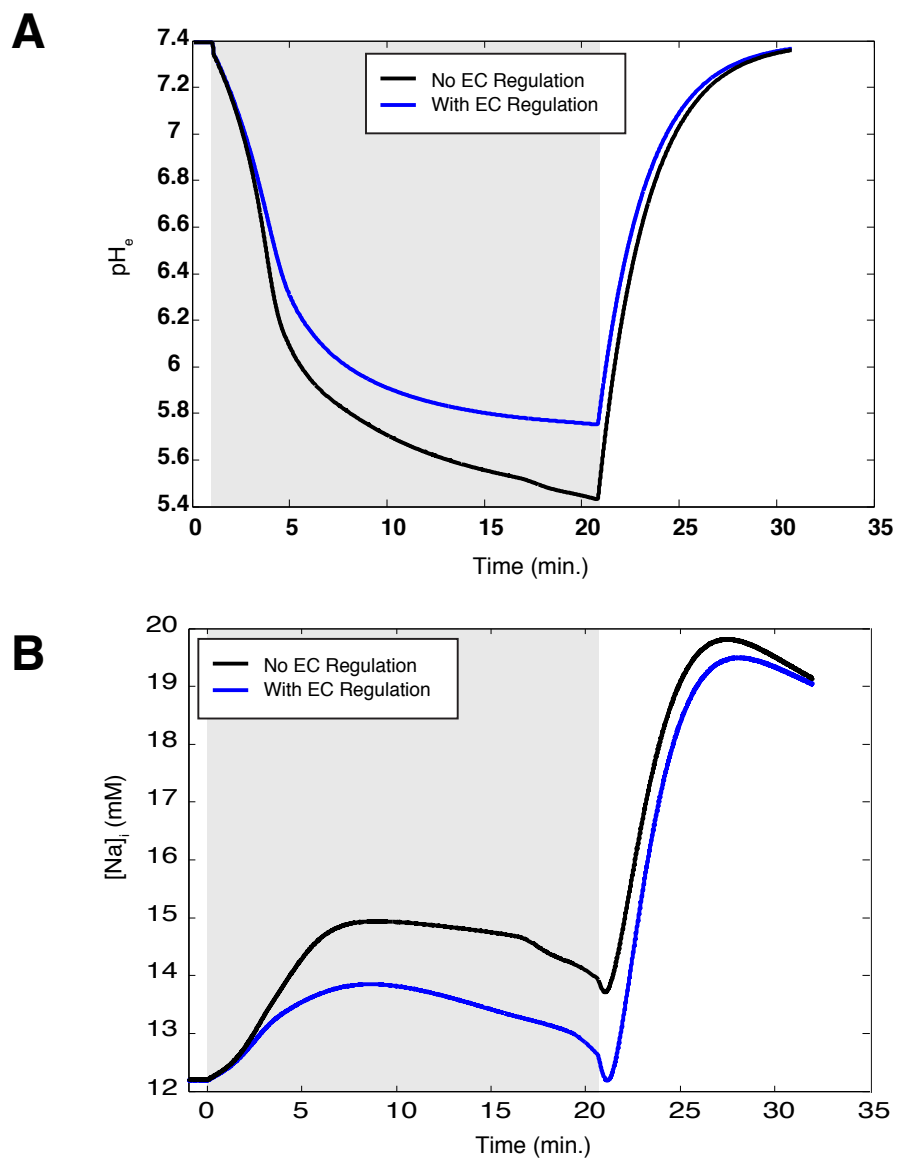

Figure S5:

## References

1. Crampin EJ, Smith NP (2006) A dynamic model of excitation-contraction coupling during acidosis in cardiac ventricular myocytes. *Biophys J* 90: 3074-90.
2. Shigematsu S, Sato T, Abe T, Saikawa T, Sakata T, et al. (1995) Pharmacological evidence for the persistent activation of atp-sensitive  $k^+$  channels in early phase of reperfusion and its protective role against myocardial stunning. *Circulation* 92: 2266-75.
3. Terkildsen JR, Crampin EJ, Smith NP (2007) The balance between inactivation and activation of the  $na^+-k^+$  pump underlies the triphasic accumulation of extracellular  $k^+$  during myocardial ischemia. *Am J Physiol Heart Circ Physiol* 293: H3036-45.
4. Gaur N, Rudy Y, Hool L (2009) Contributions of ion channel currents to ventricular action potential changes and induction of early afterdepolarizations during acute hypoxia. *Circ Res* 105: 1196-203.
5. Michailova A, Saucerman J, Belik ME, McCulloch AD (2005) Modeling regulation of cardiac  $katp$  and  $l$ -type  $ca^{2+}$  currents by atp, adp, and  $mg^{2+}$ . *Biophys J* 88: 2234-49.
6. Tran K, Smith NP, Loiselle DS, Crampin EJ (2009) A thermodynamic model of the cardiac sarcoplasmic/endoplasmic  $ca^{2+}$  (serca) pump. *Biophys J* 96: 2029-42.
7. Vaughan-Jones RD, Wu ML (1990) Extracellular  $h^+$  inactivation of  $na^{(+)}-h^+$  exchange in the sheep cardiac purkinje fibre. *J Physiol* 428: 441-66.
8. Bountra C, Vaughan-Jones RD (1989) Effect of intracellular and extracellular  $ph$  on contraction in isolated, mammalian cardiac muscle. *J Physiol* 418: 163-87.
9. van Borren MMGJ, Baartscheer A, Wilders R, Ravesloot JH (2004)  $Nhe-1$  and  $nbc$  during pseudo-ischemia/reperfusion in rabbit ventricular myocytes. *J Mol Cell Cardiol* 37: 567-77.
10. Leem CH, Lagadic-Gossmann D, Vaughan-Jones RD (1999) Characterization of intracellular  $ph$  regulation in the guinea-pig ventricular myocyte. *J Physiol* 517 ( Pt 1): 159-80.
11. Sun B, Leem CH, Vaughan-Jones RD (1996) Novel chloride-dependent acid loader in the guinea-pig ventricular myocyte: part of a dual acid-loading mechanism. *J Physiol* 495 ( Pt 1): 65-82.
12. Vaughan-Jones RD (1986) An investigation of chloride-bicarbonate exchange in the sheep cardiac purkinje fibre. *J Physiol* 379: 377-406.
13. Xu L, Mann G, Meissner G (1996) Regulation of cardiac  $ca^{2+}$  release channel (ryanodine receptor) by  $ca^{2+}$ ,  $h^+$ ,  $mg^{2+}$ , and adenine nucleotides under normal and simulated ischemic conditions. *Circ Res* 79: 1100-9.
14. Doering AE, Lederer WJ (1994) The action of  $na^+$  as a cofactor in the inhibition by cytoplasmic protons of the cardiac  $na^{(+)}-ca^{2+}$  exchanger in the guinea-pig. *J Physiol* 480 ( Pt 1): 9-20.
15. Blanchard EM, Solaro RJ (1984) Inhibition of the activation and troponin calcium binding of dog cardiac myofibrils by acidic  $ph$ . *Circ Res* 55: 382-91.

16. Li G, Martin AF, Solaro JR (2001) Localization of regions of troponin i important in deactivation of cardiac myofilaments by acidic ph. *J Mol Cell Cardiol* 33: 1309-20.
17. Boron WF, De Weer P (1976) Intracellular ph transients in squid giant axons caused by  $\text{CO}_2$ ,  $\text{NH}_3$ , and metabolic inhibitors. *J Gen Physiol* 67: 91-112.
18. Leem CH, Vaughan-Jones RD (1998) Out-of-equilibrium ph transients in the guinea-pig ventricular myocyte. *J Physiol* 509 ( Pt 2): 471-85.
19. Peluffo RD (2004) Effect of adp on  $\text{Na}^+$ - $\text{Na}^+$  exchange reaction kinetics of  $\text{Na}^+$ , $\text{K}^+$ -atpase. *Biophys J* 87: 883-98.
20. Wuddel I, Apell HJ (1995) Electrogenicity of the sodium transport pathway in the  $\text{Na}^+$ , $\text{K}^+$ -atpase probed by charge-pulse experiments. *Biophys J* 69: 909-21.
21. Campos M, Beaugé L (1994)  $\text{Na}^+$ -atpase activity of  $\text{Na}^+$ , $\text{K}^+$ -atpase. reactivity of the e2 form during  $\text{Na}^+$ -atpase turnover. *J Biol Chem* 269: 18028-36.
22. Heyse S, Wuddel I, Apell HJ, Stürmer W (1994) Partial reactions of the  $\text{Na}^+$ , $\text{K}^+$ -atpase: determination of rate constants. *J Gen Physiol* 104: 197-240.
23. Peluffo RD, Berlin JR (2003)  $\text{Na}^+$ , $\text{K}^+$ -pump reaction kinetics at the tip of a patch electrode: derivation of reaction kinetics for electrogenic and electrically silent reactions during ion transport by the  $\text{Na}^+$ , $\text{K}^+$ -atpase. *Ann N Y Acad Sci* 986: 141-9.
24. Hansen PS, Buhagiar KA, Kong BY, Clarke RJ, Gray DF, et al. (2002) Dependence of  $\text{Na}^+$ - $\text{K}^+$  pump current-voltage relationship on intracellular  $\text{Na}^+$ ,  $\text{K}^+$ , and  $\text{CS}^+$  in rabbit cardiac myocytes. *Am J Physiol Cell Physiol* 283: C1511-21.
25. Nakao M, Gadsby DC (1989)  $[\text{Na}^+]$  and  $[\text{K}^+]$  dependence of the  $\text{Na}^+$ / $\text{K}^+$  pump current-voltage relationship in guinea pig ventricular myocytes. *The Journal of General Physiology* 94: 539.
26. Friedrich T, Bamberg E, Nagel G (1996)  $\text{Na}^+$ ,  $\text{K}^+$  (+)-atpase pump currents in giant excised patches activated by an atp concentration jump. *Biophysical journal* 71: 2486-2500.
27. Mogul DJ, Singer DH, Ten Eick RE (1990) Dependence of  $\text{Na}^+$ - $\text{K}^+$  pump current on internal  $\text{Na}^+$  in mammalian cardiac myocytes. *Am J Physiol* 259: H488-96.
28. Bahinski A, Nakao M, Gadsby DC (1988) Potassium translocation by the  $\text{Na}^+$ / $\text{K}^+$  pump is voltage insensitive. *Proc Natl Acad Sci U S A* 85: 3412-6.
29. Lee SYY, Lee CO (2005) Inhibition of  $\text{Na}^+$ - $\text{K}^+$  pump and l-type  $\text{Ca}^{2+}$  channel by glibenclamide in guinea pig ventricular myocytes. *J Pharmacol Exp Ther* 312: 61-8.
30. Noma A, Shibasaki T (1985) Membrane current through adenosine-triphosphate-regulated potassium channels in guinea-pig ventricular cells. *J Physiol* 363: 463-80.
31. Nichols CG, Ripoll C, Lederer WJ (1991) Atp-sensitive potassium channel modulation of the guinea pig ventricular action potential and contraction. *Circ Res* 68: 280-7.
32. Clement JP, Kunjilwar K, Gonzalez G, Schwanstecher M, Panten U, et al. (1997) Association and stoichiometry of  $\text{K}^+$ (atp) channel subunits. *Neuron* 18: 827-38.

33. Shyng S, Nichols CG (1997) Octameric stoichiometry of the katp channel complex. *J Gen Physiol* 110: 655-64.
34. Ribalet B, John SA, Weiss JN (2003) Molecular basis for kir6.2 channel inhibition by adenine nucleotides. *Biophys J* 84: 266-76.
35. Hopkins WF, Fatherazi S, Peter-Riesch B, Corkey BE, Cook DL (1992) Two sites for adenine-nucleotide regulation of atp-sensitive potassium channels in mouse pancreatic beta-cells and hit cells. *J Membr Biol* 129: 287-95.
36. Gribble FM, Tucker SJ, Ashcroft FM (1997) The essential role of the walker a motifs of sur1 in k-atp channel activation by mg-adp and diazoxide. *The EMBO Journal* 16: 1145-1152.
37. Ueda K, Inagaki N, Seino S (1997) Mgadp antagonism to mg<sup>2+</sup>-independent atp binding of the sulfonylurea receptor sur1. *J Biol Chem* 272: 22983-6.
38. Steenbergen C, Hill ML, Jennings RB (1985) Volume regulation and plasma membrane injury in aerobic, anaerobic, and ischemic myocardium in vitro. effects of osmotic cell swelling on plasma membrane integrity. *Circ Res* 57: 864-75.
39. Trantum-Jensen J, Janse MJ, Fiolet WT, Krieger WJ, D'Alnoncourt CN, et al. (1981) Tissue osmolality, cell swelling, and reperfusion in acute regional myocardial ischemia in the isolated porcine heart. *Circ Res* 49: 364-81.
40. Befroy DE, Powell T, Radda GK, Clarke K (1999) Osmotic shock: modulation of contractile function, phi, and ischemic damage in perfused guinea pig heart. *Am J Physiol* 276: H1236-44.
41. Decking UK, Hartmann M, Rose H, Brückner R, Meil J, et al. (1998) Cardioprotective actions of kc 12291. i. inhibition of voltage-gated na<sup>+</sup> channels in ischemia delays myocardial na<sup>+</sup> overload. *Naunyn Schmiedebergs Arch Pharmacol* 358: 547-53.
42. Zweier JL, Jacobus WE (1987) Substrate-induced alterations of high energy phosphate metabolism and contractile function in the perfused heart. *J Biol Chem* 262: 8015-21.
43. Ji Y, Loukianov E, Loukianova T, Jones LR, Periasamy M (1999) Serca1a can functionally substitute for serca2a in the heart. *Am J Physiol* 276: H89-97.
44. Dode L, Vilsen B, Van Baelen K, Wuytack F, Clausen JD, et al. (2002) Dissection of the functional differences between sarco(endo)plasmic reticulum ca<sup>2+</sup>-atpase (serca) 1 and 3 isoforms by steady-state and transient kinetic analyses. *J Biol Chem* 277: 45579-91.
45. Sakamoto J, Tonomura Y (1980) Order of release of adp and pi from phosphoenzyme with bound adp of ca<sup>2+</sup>-dependent atpase from sarcoplasmic reticulum and of na<sup>+</sup>, k<sup>+</sup>-dependent atpase studied by adp-inhibition patterns. *J Biochem* 87: 1721-7.
46. Wang W, Ma J, Zhang P, Luo A (2007) Redox reaction modulates transient and persistent sodium current during hypoxia in guinea pig ventricular myocytes. *Pflugers Arch* 454: 461-75.
47. Sato R, Sakamoto K, Yamazaki J, Nagao T (2002) Differences in protective profiles of diltiazem isomers in ischemic and reperfused guinea pig hearts. *Eur J Pharmacol* 434: 125-31.

48. An J, Varadarajan SG, Camara A, Chen Q, Novalija E, et al. (2001) Blocking  $\text{Na}^+/\text{H}^+$  exchange reduces  $[\text{Na}^+]_i$  and  $[\text{Ca}^{2+}]_i$  load after ischemia and improves function in intact hearts. *Am J Physiol Heart Circ Physiol* 281: H2398-409.
49. Fleet WF, Johnson TA, Graebner CA, Gettes LS (1985) Effect of serial brief ischemic episodes on extracellular  $\text{K}^+$ , pH, and activation in the pig. *Circulation* 72: 922.
50. Kitakaze M, Takashima S, Funaya H, Minamino T, Node K, et al. (1997) Temporary acidosis during reperfusion limits myocardial infarct size in dogs. *Am J Physiol* 272: H2071-8.
51. Kleber AG (1983) Resting membrane potential, extracellular potassium activity, and intracellular sodium activity during acute global ischemia in isolated perfused guinea pig hearts. *Circ Res* 52: 442-450.
52. Faber GM, Rudy Y (2000) Action potential and contractility changes in  $[\text{Na}^+]_i$  overloaded cardiac myocytes: a simulation study. *Biophysical Journal* 78: 2392-2404.
